# Supplementary material for: Receptor tyrosine kinases CAD96CA and FGFR1 function as the cell membrane receptors of insect juvenile hormone
Source: eLife. 2025 Mar 14;13:RP97189. doi: 10.7554/eLife.97189 (PMC11908783; doi:10.7554/eLife.97189)
Supplement: Figure 1—figure supplement 3—source data 1. [file elife-97189-fig1-figsupp3-data1.xlsx]

## Sheet: Figure 1–figure supplement 3A
Figure 1–figure supplement 3A		dsGFP+JH III									dsRtk+JH III
	Alk	0.941696	0.941696	1.12766	1.24833	0.952638	0.840896	0.793701	1.33484	0.943874	0.239816	0.444421	0.257028	0.165702	0.125579	0.265478	0.144586	0.134904	0.168404
	Cad96ca	1.13813	0.777366	1.13027	1.10957	0.895025	1.00696	0.968171	0.99539	1.03766	0.168016	0.302848	0.302848	0.364334	0.300062	0.287839	0.316439	0.297302	0.266093
	Ddr	0.76313	1.1019	1.18921	0.786399	1.1355	1.11987	0.848704	0.928731	1.26868	0.133662	0.357661	0.211198	0.430276	0.371989	0.36942	0.132433	0.111362	0.159689
	Dnt	0.990801	1.02574	0.983957	1.07177	0.858565	1.08674	1.13027	1.06191	0.833161	0.50581	0.452712	0.557354	0.383332	0.350301	0.422396	0.410845	0.452712	0.561231
	Drl	0.779165	0.965936	1.32869	1.16473	0.864537	0.993092	1.07177	1.07177	0.870551	0.034276	0.023411	0.022614	0.02024	0.046177	0.018884	0.082089	0.074497	0.092997
	Eddr	0.890899	1.08173	1.03766	0.913831	1.33793	0.817902	0.935191	1.27751	0.83702	0.395934	0.264866	0.625609	0.139984	0.116899	0.163044	0.251739	0.184284	0.203063
	Egfr	1.25122	0.878633	0.909618	0.707107	1.1019	1.28343	0.838956	0.97716	1.21982	0.380684	0.258219	0.360149	0.217638	0.223756	0.186856	0.257623	0.237062	0.354371
	Ephb2	1	0.97942	1.02101	1.33793	0.82932	0.90125	1.01631	0.791869	1.24257	0.461158	0.374577	0.302149	0.816014	0.498846	0.278677	0.16532	0.099672	0.091717
	Fgfr1	1.0693	0.856584	1.09177	1.03527	1.11729	0.864537	1.07177	0.90125	1.03527	0.189027	0.39685	0.357661	0.410845	0.557354	0.309212	0.770215	0.533416	0.638754
	Igfr1	0.954842	1.19196	0.878633	0.740549	1.28937	1.04729	1.02101	1.20581	0.812252	0.439317	0.439317	0.526072	0.266093	0.135842	0.115824	0.296616	0.315709	0.437291
	Inr	1.1355	1.25122	0.703847	1.15936	0.708742	1.217	1.04247	0.993092	0.965936	0.360149	0.143256	0.122995	0.122145	0.099213	0.23272	0.186856	0.066064	0.092783
	Nrk	0.909618	0.878633	1.25122	1.03288	0.911722	1.06191	1.43396	0.757858	0.920188	0.387786	0.349492	0.412748	0.412748	0.312805	0.56383	0.097396	0.145592	0.130308
	Otk	0.80107	1.29235	0.965936	0.939523	1.07177	0.993092	1.05215	0.954842	0.99539	0.378055	0.367717	0.443396	0.108568	0.131822	0.191666	0.099903	0.139339	0.180075
	Ror	1.1355	0.831238	1.05946	1.09682	0.884745	1.03049	1.01631	1.217	0.808508	0.471937	0.449585	0.471937	0.387786	0.501157	0.583714	0.450625	0.309927	0.45376
	Ror-like	0.981686	1.05215	0.968171	0.812252	0.939523	1.31039	1.1487	0.790041	1.1019	0.132739	0.094514	0.105599	0.17234	0.158586	0.179659	0.327598	0.285191	0.358489
	Ros	0.981686	1.11987	0.909618	0.920188	1.16473	0.933033	1.06683	1.28639	0.728668	0.360149	0.481854	0.593231	0.178418	0.076592	0.125289	0.266093	0.25349	0.293209
	Ste20-like	1.09682	0.968171	0.941696	1.12766	1.05215	0.842842	1.08674	1.1487	0.80107	0.391387	0.7457	0.176369	0.407066	0.467596	0.51883	0.436282	0.312805	0.461158
	Torso	0.82932	0.986233	1.22264	1.00231	1.22547	0.814131	0.937354	1.00463	1.06191	0.455861	0.313528	0.350301	0.17515	0.194342	0.251158	0.195693	0.140308	0.113178
	Vegfr1	0.959264	1.13288	0.920188	1.09177	0.856584	1.0693	0.92445	1.13813	0.950439	0.274206	0.200731	0.268563	0.439317	0.515246	0.579682	0.589134	0.609909	0.644685
	Wsck	0.90125	1.20581	0.920188	1.23971	0.993092	0.812252	0.76313	1.14076	1.1487	0.447513	0.336808	0.514057	0.48858	0.437291	0.375443	0.291857	0.464366	0.349492

## Sheet: Figure 1–figure supplement 3B
Figure 1–figure supplement 3B	Vegfr1	dsGFP+JH III	dsFgfr1+JH III		Nrk	dsGFP+JH III	dsRor+JH III
		1.05458	0.890899			0.890899	0.819794
		0.89296	0.825496			1.18372	0.860551
		1.06191	1.04488			0.948246	0.775572
		0.946058	0.759611			0.878633	0.619854
		1.19748	0.73884			1.03049	0.823591
		0.882703	0.759611			1.10445	1.25701
		0.749154	1.04247			1.1434	1.28639
		1.01631	1.13288			0.928731	1.00231
		1.31343	0.702222			0.941696	0.842842
	Fgfr1	dsGFP+JH III	dsVegfr1+JH III		Drl	dsGFP+JH III	dsWsck+JH III
		0.689362	0.819794			1.1355	0.773782
		1.15936	1.03049			0.831238	0.737135
		1.25122	1.11214			1.05946	0.773782
		0.882703	1.25701			1.01631	1.16743
		1.12506	0.806642			0.968171	0.854607
		1.00696	0.812252			1.01631	1.08925
		1.07923	0.786399			0.95705	0.749154
		0.697372	0.749154			0.93088	1.05946
		1.32869	1.06683			1.12246	1.06683
	Ephb2	dsGFP+JH III	dsSte20-like+JH III		Wsck	dsGFP+JH III	dsDrl+JH III
		1.28937	1.20025			0.694157	1.38191
		1.00463	0.802923			1.18372	0.92445
		0.771997	1.29534			1.217	1.30737
		0.6846	0.777366			1.18099	0.7457
		1.43727	1.00463			0.768438	1.18646
		1.01631	0.862542			1.1019	1.0693
		1.35035	0.747425			0.766664	0.882703
		0.915945	0.752623			1.00463	0.907519
		0.808508	1.06437			1.29834	1.03527
	Set20-like	dsGFP+JH III	dsEphb2+JH III		Fgfr1	dsGFP+JH III	dsCad96Ca+JH III
		1.02574	1.23685			1	0.80478
		1.13027	1.30737			0.97942	0.793701
		0.862542	1.25411			1.02101	0.80478
		1.11729	0.905425			1.09936	0.928731
		0.817902	1.0693			0.816014	0.99539
		1.09429	0.868541			1.11471	1.22547
		1.04488	1.39152			0.954842	1.1019
		1.15135	1.19471			1.03049	1.33793
		0.831238	0.886791			1.01631	1.23114
	Ror	dsGFP+JH III	dsNrk+JH III		Cad96ca	dsGFP+JH III	dsFgfr1+JH III
		0.954842	1.02574			0.988514	1.27456
		0.831238	1.08423			0.743979	0.712025
		1.25992	1.12246			1.35974	1.08674
		1.08173	0.678302			1	1.06683
		0.842842	0.882703			0.97942	0.866537
		1.09682	0.607097			1.02101	1.1355
		0.913831	1.17013			1.32562	0.909618
		0.80107	1.04006			0.89296	0.802923
		1.36604	0.905425			0.844791	0.780967
