# Supplementary material for: Receptor tyrosine kinases CAD96CA and FGFR1 function as the cell membrane receptors of insect juvenile hormone
Source: eLife. 2025 Mar 14;13:RP97189. doi: 10.7554/eLife.97189 (PMC11908783; doi:10.7554/eLife.97189)
Supplement: Figure 1—figure supplement 4—source data 1. [file elife-97189-fig1-figsupp4-data1.xlsx]

## Sheet: Figure 1–figure supplement 4A
Figure 1–figure supplement 4A	Vegfr1	Epidermis			Midgut			Fat body
	5F	1.02811	1.01396	0.959264	1.61702	1.52979	2.06098	3.01049	2.65737	2.75108
	5M	0.926588	0.757858	0.965936	1.35974	1.69741	1.47768	3.03844	2.30271	2.68205
	6th-6 h	3.04547	3.67226	4.16024	4.74585	4.2772	3.57184	5.3765	4.21831	5.9656
	6th-24 h	7.78124	7.6211	6.63456	8.6538	8.13044	7.17676	8.6139	7.44704	6.80534
	6th-48 h	7.27695	8.7746	6.83686	10.9789	12.5244	15.207	10.0097	7.27695	8.07428
	6th-72 h	4.33691	4.68051	5.76239	5.95183	5.03968	4.48985	6.57352	7.19336	6.04887
	6th-96 h	3.02444	3.64689	3.15287	3.37916	3.7755	4.48985	7.26015	4.65893	5.27803
	6th-120 h	2.07053	2.23457	2.08493	1.28343	1.76541	2.17347	3.53898	2.48515	2.81539
	P-0 d	2.49666	3.07375	3.50642	3.74077	5.82934	4.41782	6.1475	5.1337	4.28709
	P-2 d	2.64512	2.7007	2.81539	3.75809	4.34694	4.99332	4.40762	4.28709	5.77572
	P-4 d	2.69447	1.6358	2.42839	3.46615	4.03714	3.92674	4.357	5.14558	3.81937
	P-6 d	2.05623	1.36604	1.09429	1.73307	2.13366	2.38392	2.9828	2.61474	2.40605
	P-8 d	2.18859	2.63902	2.05623	3.53898	3.32495	2.77663	3.88164	4.18918	3.28676
	Drl	Epidermis			Midgut			Fat body
	5F	1.02101	0.852635	1.1487	1.48452	1.04972	1.21419	1.02811	1.13288	0.858565
	5M	1.07923	1.04972	0.840896	1.11729	1.62451	1.23114	0.848704	0.890899	1.00231
	6th-6 h	3.6217	3.9632	3.08799	6.96441	4.92458	5.57897	3.41054	4.59479	4.19887
	6th-24 h	8.1681	7.51618	6.49802	5.51489	7.74537	6.60397	4.8121	5.26585	4.39745
	6th-48 h	7.78124	7.31065	8.57419	6.43824	8.91767	7.3956	7.56846	5.16941	5.6962
	6th-72 h	4.66971	6.07689	4.17951	6.03491	5.70938	4.76783	3.76678	2.7007	3.05958
	6th-96 h	4.46915	2.92817	3.91768	4.57361	5.07474	3.61334	2.78949	3.01049	2.32947
	6th-120 h	2.15846	2.46229	1.94531	1.58008	1.81504	2.21914	1.31039	1.27456	1.28343
	P-0 d	2.93494	2.46798	3.74077	3.61334	3.03844	3.23403	2.83497	2.19365	2.07532
	P-2 d	2.87454	2.81539	2.43401	2.68205	2.3511	1.93634	1.97246	2.32947	2.18859
	P-4 d	2.75745	2.08975	2.95536	2.80241	2.30804	1.99538	1.76949	1.89649	2.03261
	P-6 d	1.52979	1.87038	1.31343	1.77358	1.47087	1.66632	1.23971	1.13288	1.04247
	P-8 d	2.78305	2.61474	1.94082	2.86129	2.37292	2.30804	2.66352	1.84463	2.06098
	Cad96ca	Epidermis			Midgut			Fat body
	5F	0.941696	1.20025	0.884745	1.39797	1.25122	0.968171	1.34102	1.24257	1.06683
	5M	0.764895	0.903335	0.981686	1.03288	1.14605	0.93088	1.13027	1.08423	1.4012
	6th-6 h	4.9703	3.63847	4.20858	2.9897	4.34694	2.69447	4.30695	5.60482	4.77886
	6th-24 h	6.04887	6.71165	5.5661	5.05134	4.58419	4.91321	6.16172	8.53466	8.0185
	6th-48 h	4.87927	6.3496	6.80534	6.37901	6.88441	7.07796	9.02129	8.6538	8.18699
	6th-72 h	2.41162	3.18215	3.22657	3.65533	4.78991	5.6962	4.76783	6.29119	5.51489
	6th-96 h	2.4005	3.12387	2.68205	5.01645	4.8121	3.54717	5.07474	4.12197	3.76678
	6th-120 h	1.90528	1.50525	1.6358	1.74513	2.38392	1.52979	1.15936	1.28639	1.41749
	P-0 d	2.02792	1.93187	1.91853	2.90123	3.59668	2.42279	3.37916	2.05148	2.38943
	P-2 d	1.50525	2.01391	1.84038	2.38392	1.68568	2.1785	1.34723	2.26577	2.09943
	P-4 d	1.20025	1.60585	1.56193	2.33486	2.22427	1.7818	1.36289	1.50177	1.78592
	P-6 d	0.854607	1.28639	1.05946	1.3692	1.17555	1.2086	1.26284	1.30737	1.5874
	P-8 d	1.70921	2.03261	2.4005	2.38392	2.87454	3.03844	1.74917	2.10916	1.51222
	Nrk	Epidermis			Midgut			Fat body
	5F	1.13288	0.959264	0.920188	0.890899	1.00928	1.11214	1.06683	1.03049	0.909618
	5M	0.831238	0.83702	1.17555	0.629961	0.73884	0.728668	0.990801	0.983957	0.93088
	6th-6 h	0.788218	0.761369	0.937354	0.526072	0.698985	0.842842	1.18372	1.16743	1.1355
	6th-24 h	2.21914	3.24901	1.93187	2.89454	3.10229	2.31873	8.73415	7.34451	8.14925
	6th-48 h	8.91767	8.6139	7.81728	8.59402	8.71399	10.6541	4.50023	3.16017	4.05584
	6th-72 h	3.46615	3.08086	3.30199	5.59188	3.41843	4.90187	1.76949	1.66248	1.90968
	6th-96 h	2.92141	2.8219	2.4909	3.98156	4.54202	3.68926	1.53687	1.33793	1.82766
	6th-120 h	0.732043	1	0.768438	0.689362	0.634342	0.595979	0.827406	0.740549	0.788218
	P-0 d	1.62826	1.3692	1.08173	2.48515	3.18951	1.87038	1.89211	2.46229	2.28153
	P-2 d	1.43065	1.41095	1.0693	2.64512	2.13366	1.65099	1.32562	1.96791	2.15347
	P-4 d	1.25122	1.22547	1.29534	2.00463	1.46747	2.10429	1.43065	1.5874	2.18354
	P-6 d	0.791869	0.608502	0.791869	1.11987	0.814131	0.897095	1.39797	1.217	0.915945
	P-8 d	1.29534	1.22547	1.68568	1.58374	1.61702	1.2086	1.25411	1.50177	2.02324
	Fgfr1	Epidermis			Midgut			Fat body
	5F	1.0451	1.00036	1.003	1.01823	1.00691	1.0064	1.01512	1.00872	1.06683
	5M	2.19568	0.951029	2.63031	1.75181	2.32445	2.89928	0.812084	2.03143	1.4012
	6th-6 h	2.70799	1.50775	4.40644	0.985227	1.16171	2.08651	0.085006	0.526523	4.77886
	6th-24 h	1.12154	2.7911	5.9365	16.9678	14.8355	34.1555	0.338183	4.19142	8.0185
	6th-48 h	35.0393	25.2898	36.8019	546.274	624.927	498.785	5.77451	8.66854	8.18699
	6th-72 h	19.2453	16.0244	34.429	238.223	425.044	222.951	1.47839	4.97246	5.51489
	6th-96 h	30.9271	25.9477	38.0012	98.2357	153.824	71.714	2.62839	3.92577	3.76678
	6th-120 h	46.509	40.1123	41.608	65.1427	52.7661	36.6328	4.41092	8.57362	1.41749
	P-0 d	15.3883	2.05311	1.58075	110.655	70.5416	69.4596	1.88018	3.65553	2.82061
	P-2 d	18.9898	2.87616	3.15893	73.478	77.5144	115.871	4.01457	12.485	11.9664
	P-4 d	14.0331	3.87349	1.59372	51.8007	50.0352	49.4645	3.47507	1.43469	7.15936
	P-6 d	14.5923	26.826	37.4962	6.20926	7.78923	21.838	1.05687	1.77574	1.71534
	P-8 d	19.3501	21.0908	13.9496	20.8968	12.4573	30.5437	0.633826	1.01082	1.6043
	Wsck	Epidermis			Midgut			Fat body
	5F	1.01184	1.00958	1.01301	1.03255	1.00251	1.01946	1.0127	1.00154	1.00688
	5M	0.198759	2.42288	1.73855	2.53237	1.57331	2.37036	3.78253	2.05939	2.3742
	6th-6 h	0.472229	1.63002	2.09319	0.347133	0.762181	0.61699	3.91917	0.323594	1.05977
	6th-24 h	1.1077	2.04696	2.45749	0.578086	0.654978	0.915766	1.01964	1.6114	3.84415
	6th-48 h	4.25223	6.31188	6.9341	9.83283	4.28098	11.3237	5.12413	7.84009	5.80581
	6th-72 h	3.32819	4.41897	4.22247	6.49041	2.68256	9.60512	4.08774	3.75346	5.75709
	6th-96 h	2.90057	2.1785	3.71651	6.0442	2.37163	4.31654	5.18513	5.95481	5.36461
	6th-120 h	3.22242	5.13665	3.97668	1.33435	1.35512	3.34527	2.62839	3.94326	2.71321
	P-0 d	1.78268	3.54529	4.51061	4.26911	5.8221	2.5799	5.88854	3.50337	6.33727
	P-2 d	8.54766	7.16633	5.23264	10.8867	11.9905	13.108	7.76074	11.2152	6.32461
	P-4 d	1.80112	2.04757	4.80898	12.1879	16.6626	16.3717	5.18895	2.90692	8.38403
	P-6 d	2.51348	3.54529	1.59257	4.26273	5.80646	5.51054	2.69306	1.03758	0.606711
	P-8 d	4.31943	5.968	5.71482	1.74375	5.67652	4.02396	2.91454	0.552636	1.27862

## Sheet: Figure 1–figure supplement 4B
Figure 1–figure supplement 4B	Vegfr1		Kr-h1		Br-z7
	dsGFP+JH III	dsVegfr1+JH III	dsGFP+JH III	dsVegfr1+JH III	dsGFP+JH III	dsVegfr1+JH III
	1.03527	0.327598	0.988514	0.139339	0.918064	1.01162
	1.06437	0.295248	0.915945	0.122145	1.00463	1.02574
	0.907519	0.295248	1.10445	0.103426	1.08423	0.82169
	0.990801	0.320116	0.90125	0.471937	0.974905	0.878633
	0.97716	0.315709	1.02811	0.597358	1.1355	1.17555
	1.03288	0.340722	1.07923	0.343092	0.903335	1.35035
	1.02337	0.247129	1.07923	0.356013	0.997692	0.95705
	0.948246	0.349492	0.926588	0.411796	0.880666	0.777366
	1.03049	0.257623	1	0.368567	1.13813	1.09177
	Drl		Kr-h1		Br-z7
	dsGFP+JH III	dsDrl+JH III	dsGFP+JH III	dsDrl+JH III	dsGFP+JH III	dsDrl+JH III
	0.948246	0.323836	0.988514	0.182588	1.00231	0.884745
	0.903335	0.247129	1.03766	0.218646	1.11214	0.903335
	1.16743	0.328356	0.974905	0.242603	0.897095	1.18372
	0.993092	0.304955	1.10701	0.438303	1.06683	1.18099
	0.959264	0.350301	0.983957	0.417544	1.08925	1.29235
	1.04972	0.33371	0.918064	0.486327	0.860551	1.21419
	1.13027	0.263645	1.10957	0.336808	1.14076	0.823591
	0.983957	0.274841	0.965936	0.441351	0.817902	0.952638
	0.899171	0.114758	0.933033	0.312083	1.07177	0.926588
	Cad96ca		Kr-h1		Br-z7
	dsGFP+JH III	dsCad96ca+JH III	dsGFP+JH III	dsCad96ca+JH III	dsGFP+JH III	dsCad96ca+JH III
	0.97041	0.498846	0.946058	0.408007	1.12766	1.99078
	0.997692	0.41658	1.14076	0.347881	0.854607	1.83189
	1.03288	0.459032	0.926588	0.434271	1.03766	1.89649
	1.00928	0.407066	1.17555	0.377182	1.02574	1.8489
	1.08925	0.439317	0.954842	0.356836	1.05458	2.4909
	0.909618	0.508152	0.890899	0.448548	0.92445	2.43964
	0.946058	0.474123	1.05946	0.387786	1.01396	2.75108
	1.04972	0.356836	0.974905	0.522439	0.946058	2.17347
	1.00696	0.351923	0.968171	0.439317	1.04247	2.41162
	Nrk		Kr-h1		Br-z7
	dsGFP+JH III	dsNrk+JH III	dsGFP+JH III	dsNrk+JH III	dsGFP+JH III	dsNrk+JH III
	0.835088	0.216634	1.05702	0.323836	1.04488	2.37841
	1.00696	0.228986	1.04972	0.427304	0.981686	1.95884
	1.18921	0.215138	0.90125	0.395934	0.974905	2.53151
	1.17827	0.132127	0.935191	0.223756	0.95705	2.50244
	0.97041	0.174343	0.903335	0.147624	1.02574	2.22427
	0.874583	0.15283	1.18372	0.193446	1.01866	2.4005
	0.897095	0.366868	1.10957	0.23871	0.842842	2.35653
	1.11987	0.494257	1.06437	0.209255	1.09682	2.03731
	0.99539	0.424352	0.846745	0.224274	1.08173	1.9141
	Fgfr1		Kr-h1		Br-z7
	dsGFP+JH III	dsFgfr1+JH III	dsGFP+JH III	dsFgfr1+JH III	dsGFP+JH III	dsFgfr1+JH III
	1.16473	0.234339	1.12506	0.355191	0.890899	2.7007
	0.907519	0.249423	0.888843	0.24429	1.15936	1.96337
	0.946058	0.20829	1	0.102002	0.968171	2.79594
	0.831238	0.145928	0.880666	0.187722	0.756109	2.70695
	1.00928	0.131518	1.21982	0.300756	1.25411	3.57184
	1.19196	0.148995	0.93088	0.304955	1.05458	3.00355
	1.01396	0.251158	0.981686	0.257623	1.16743	2.14851
	0.895025	0.311362	0.83702	0.409897	0.961483	2.28681
	1.1019	0.326842	1.217	0.321599	0.890899	1.92297
	Wsck		Kr-h1		Br-z7
	dsGFP+JH III	dsWsck+JH III	dsGFP+JH III	dsWsck+JH III	dsGFP+JH III	dsWsck+JH III
	0.882703	0.192554	1.12506	0.266708	1.25122	1.72907
	1.30134	0.202127	0.888843	0.207809	0.860551	1.31951
	0.870551	0.261219	1	0.222725	0.928731	1.79005
	1.17827	0.415619	0.726986	0.370274	1.04247	1.80667
	0.983957	0.442372	1.16473	0.527289	0.895025	1.49831
	0.862542	0.36942	1.18099	0.422396	1.07177	1.61702
	0.948246	0.188156	0.981686	0.214641	0.864537	1.48452
	0.814131	0.234881	0.83702	0.236514	0.972655	1.49485
	1.29534	0.203063	1.217	0.269807	1.18921	1.85318
