# Supplementary material for: Receptor tyrosine kinases CAD96CA and FGFR1 function as the cell membrane receptors of insect juvenile hormone
Source: eLife. 2025 Mar 14;13:RP97189. doi: 10.7554/eLife.97189 (PMC11908783; doi:10.7554/eLife.97189)
Supplement: Figure 1—source data 1. [file elife-97189-fig1-data1.xlsx]

## Sheet: Figure 1A
Figure 1A			Kr-h1
	DMSO		1.02101	1.07923	0.907519	1.04488	0.954842	1.00231	1.11471	0.905425	0.990801
	JH III		9.29636	7.60352	8.14925	6.96441	5.85634	6.02099	7.9264	7.70966	7.44704
	dsGFP	+ JH III	7.21	7.06162	9.44794	6.29119	7.74537	7.63873	7.53357	7.79924	6.83686
	dsCad96ca		2.73208	2.37841	2.73208	2.1785	2.04675	1.93634	3.81055	2.71321	3.63008
	dsDrl		4.8121	4.48985	4.91321	2.94854	3.13834	2.88786	3.57184	4.48985	3.26406
	dsFgfr1		1.99538	1.74917	2.2921	2.23974	2.87454	2.50244	2.8219	3.1748	4.21831
	dsNrk		2.47369	2.00926	3.19688	3.30962	2.32409	2.38943	3.49026	4.66971	3.98156
	dsVegfr1		3.04547	3.26406	2.78305	2.36745	2.33486	2.75745	2.41162	2.07053	2.80889
	dsWsck		2.19872	2.38943	2.65124	3.86375	2.37841	2.32947	4.03714	3.81937	3.84593
	dsSte20-like		9.89477	8.03705	6.39377	6.1475	6.9163	5.89708	8	6.49802	7.6211
	dsEphb2		6.75833	10.9789	7.9264	7.1602	7.51618	6.19026	7.2434	8.32048	5.76239
	dsRor		8.7949	9.55772	8.32048	6.48302	5.84283	6.66528	7.6211	7.3615	5.65685
	dsInr		10.0561	6.96441	6.9163	8.9383	6.58873	7.6211	7.551	7.49884	8.7949
	dsIgfr1		9.89477	8.49531	12.966	7.3956	8.49531	7.70966	8.69388	8.39773	9.98664
	dsEgfr		9.60199	7.48153	8.18699	7.88986	6.45313	8.39773	11.8488	8.14925	7.81728
	dsDdr		6.88441	9.08404	10.0794	5.54044	6.36429	6.19026	9.51366	9.71356	8.05564
	dsDnt		9.38268	11.5514	12.9063	6.66528	7.60352	9.89477	6.9323	7.69186	8.83563
	dsEddr		10.1965	12.7286	11.3924	7.63873	8.30128	9.80375	7.19336	7.6564	6.57352
	dsOtk		6.39377	6.94833	8.43663	6.52812	7.04533	9.9636	8.18699	10.5805	9.60199
	dsRos		8.32048	6.80534	9.75855	7.94474	9.44794	5.9794	8.71399	7.53357	7.27695
	dsTorso		15.1719	14.3535	13.4855	10.6787	10.8278	9.6242	12.042	11.8762	13.2691
	dsRor-like		7.56846	8.05564	6.82108	6.39377	9.42614	6.61925	5.76239	7.81728	8.37835
	dsAlk		14.1233	12.5534	16	13.8967	12.6992	16.4119	11.9588	13.6422	10.7779
			Vg
	DMSO		1.19196	0.866537	0.968171	1.04972	1.20581	0.790041	0.993092	1.18921	0.846745
	JH III		2.94854	3.45815	2.78949	3.35582	3.99077	2.8219	2.92817	2.71321	2.9897
	dsGFP	+ JH III	3.61334	2.95536	2.6087	3.07375	3.38698	3.13834	2.94173	2.74473	2.68825
	dsCad96ca		1.62826	1.30435	1.08172	1.6245	1.6358	1.36604	1.15136	1.20025	1.1355
	dsDrl		1.76541	1.56917	1.53688	1.25411	1.37237	1.16205	1.33793	1.48452	1.50525
	dsFgfr1		1.64718	1.42405	1.49485	1.10957	1.36604	1.31039	1.6245	1.34723	1.31039
	dsNrk		1.18099	1.46409	1.56917	1.32256	1.45734	1.51922	1.74917	1.42076	1.15402
	dsVegfr1		1.24833	1.34723	1.55833	1.16473	1.23971	1.46409	1.27751	1.40769	1.32256
	dsWsck		1.26576	1.56917	1.29235	1.32562	1.41095	1.4811	1.42076	1.32562	1.24545
	dsSte20-like		3.78423	3.13834	2.90795	2.8219	3.45017	3.8282	3.12387	2.68204	2.93494
	dsEphb2		2.82843	2.80889	2.73208	3.15287	3.54717	3.26406	2.94854	3.65533	3.43426
	dsRor		2.73208	3.13834	3.41054	3.76678	3.44221	3.32495	2.77663	3.10229	3.30198
	dsInr		1.20581	1.47427	1.44393	1.28639	1.39797	1.35035	1.32256	1.51922	1.46747
	dsIgfr1		2.59068	2.27101	2.66352	2.74473	3.10947	2.9622	3.09513	2.71321	2.96905
	dsEgfr		2.34026	2.68825	2.18354	2.24492	2.32409	2.66968	3.18215	3.31728	3.91768
	dsDdr		2.80241	2.72578	3.00355	3.28676	3.04547	2.9828	3.44221	3.01746	3.23403
	dsDnt		3.23403	3.44221	3.01746	3.87268	3.44221	3.21169	3.40267	2.76383	2.9622
	dsEddr		3.21169	2.77663	2.97592	3.03143	3.5801	2.75108	2.58471	2.9897	3.29436
	dsOtk		3.83706	2.90795	3.41054	2.89454	2.51984	3.1456	3.19688	3.49833	3.04547
	dsRos		2.8481	3.45815	3.18215	3.9632	3.10947	3.21912	3.26406	2.66968	2.92141
	dsTorso		4.9818	3.9632	4.21831	2.93494	2.97592	2.57279	2.68204	2.99661	3.34808
	dsRor-like		3.51453	3.03845	4.03714	3.37137	3.79298	3.03845	2.82843	3.24901	3.50642
	dsAlk		4.12197	4.76783	5.03968	3.71493	2.89454	3.25653	3.37137	3.79298	3.44221
			Jhi-1
	DMSO		1.11987	0.974905	0.915945	1.08673	1	0.920188	1.11729	0.90125	0.993092
	JH III		2.2974	2.49666	2.41162	2.03731	1.95432	1.88775	1.71713	1.87905	1.59107
	dsGFP	+ JH III	2.46798	2.23974	2.10429	1.79005	2.21914	2.07053	1.56555	1.68958	1.8489
	dsCad96ca		2.30271	1.96337	2.10429	2.39496	2.17347	1.95884	1.85746	1.67404	1.51922
	dsDrl		2.60268	2.07053	1.79005	2.1386	2.03731	1.81085	1.6358	1.8025	1.48452
	dsFgfr1		2.09943	1.91853	2.31338	2.11404	1.70527	1.59107	1.60214	1.7411	1.89212
	dsNrk		2.73208	2.41162	2.11404	1.88339	2.03261	1.7211	1.73708	1.9816	1.62076
	dsVegfr1		2.44528	2.08493	2.31338	2	1.87905	2.17347	1.76949	1.7211	1.93634
	dsWsck		2.69447	2.32947	2.08493	1.76133	2.08012	2.1386	1.71317	1.92741	1.99538
	dsSte20-like		2.23457	2.20381	2.39496	2.16845	1.78592	2.00926	1.79419	1.89649	1.66248
	dsEphb2		2.23457	2.07053	1.94531	2.16845	2.40605	1.94082	1.93187	1.6245	1.61328
	dsRor		2.46229	2.09943	2.04202	1.89649	2.38392	2.16345	1.67404	1.96337	1.79419
	dsInr		1.76541	2.08493	2.02792	1.99078	2.13366	2.25532	1.93634	1.83189	1.68568
	dsIgfr1		1.97703	2.31873	2.08975	1.96791	2.12383	2.19872	1.95884	2.04202	2.25012
	dsEgfr		1.74917	2.19872	2.38943	1.79834	2.05148	1.94082	1.52626	1.71713	1.55833
	dsDdr		2.05148	2.27626	2.15348	2.06575	2.42279	2.26054	1.81924	2.23974	2.01857
	dsDnt		2.16345	2.11893	1.92297	1.99078	2.11893	2.03261	2.03731	2.16845	1.99538
	dsEddr		2.1785	1.96337	2.00463	2.41162	1.90528	2.05623	1.82766	2.04202	1.91853
	dsOtk		2.28153	2.18859	2.54912	2.3511	2.01857	1.89649	1.92741	1.74917	1.66632
	dsRos		2.32947	1.98618	1.90528	2.05148	2.59668	2.27626	1.8489	2.19872	2.02324
	dsTorso		1.81085	1.94082	2.22942	2.14851	2.41719	2.04675	1.66248	1.83189	1.93634
	dsRor-like		1.96337	2.27101	1.93634	2.31873	2.45094	3.03845	1.86607	1.71713	1.72907
	dsAlk		1.93634	2.45094	1.85746	2.16345	2.38392	2.01857	1.66248	1.75727	1.85746
			Jhi-26
	DMSO		0.913831	1.15669	0.946058	1.02101	1.22264	0.80107	1.02337	1.22547	0.797377
	JH III		5.76239	6.3496	7.14368	7.87165	6.61924	7.81728	6.74273	6.03491	5.36409
	dsGFP	+ JH III	4.75683	8.05564	6.49802	5.93809	9.18959	8.57419	5.31474	5.65685	7.01285
	dsCad96ca		2	2.25012	2.54912	3.20428	2.02792	1.93187	2.40605	2.02324	2.38943
	dsDrl		8.5544	6.52812	5.41389	5.5661	9.75855	8.7949	8.07428	5.51489	5.99323
	dsFgfr1		2.27626	2.84153	2.78305	3.22657	3.83706	2.62079	2.45094	2.91467	2.10429
	dsNrk		1.63203	2.18354	2.16845	1.00928	1.28639	1.23399	1.30134	1.72907	1.51572
	dsVegfr1		1.60956	2.4909	2.10916	2.96905	2.02792	2.20381	2.56093	2.24492	2.02324
	dsWsck		7.04533	6.09095	6.26219	8.6139	7.2434	7.98154	8.57419	8.22491	6.86852
	dsSte20-like		5.33936	6.80534	5.15748	7.98154	6.13331	5.68305	6.43824	5.92439	6.17597
	dsEphb2		5.15748	5.68305	6.43824	6.71165	5.80247	9.04216	7.17676	8.7746	6.42338
	dsRor		6.3496	4.61608	7.34451	7.58597	6.03491	8.4757	6.99666	5.5661	8.5544
	dsInr		5.9656	5.60481	7.29378	6.46806	7.69186	8.59402	7.98154	6.26219	5.84283
	dsIgfr1		6.58873	7.06162	5.73582	6.66529	7.19336	6.04887	8.24394	5.59188	6.6499
	dsEgfr		6.20458	5.11004	5.29024	8.9797	5.88347	5.52765	8.30128	5.43897	6.69616
	dsDdr		7.48153	5.14558	6.33495	7.6564	7.81728	6.66529	7.70966	7.87165	6.71165
	dsDnt		6.82108	7.6211	8.51496	6.55835	6.46806	9.4698	7.83536	7.72749	5.65685
	dsEddr		8.33973	7.11074	6.27667	6.6807	9.44794	8.63383	5.63077	6.51305	5.95183
	dsOtk		6.00709	5.80247	7.34451	9.33942	7.48153	8.71399	7.51618	9.64646	5.81589
	dsRos		5.30248	7.76328	6.30574	7.98154	10.173	9.16838	7.88986	10.0561	6.40856
	dsTorso		8.53466	8.41716	10.5805	12.0698	12.1538	10.3627	12.6115	12.6992	10.8278
	dsRor-like		6.45313	4.99332	4.99332	9.08404	6.6499	5.78908	5.99323	7.58597	6.55835
	dsAlk		11.2356	9.00047	9.44794	8.35902	10.6541	11.0298	10.173	10.5317	13.4233

## Sheet: Figure 1C
Figure 1C		Pupation on time			Delayed pupation			Dead
	DMSO	93.3333	93.3333	94.4444				6.66667	6.6667	5.5556
	JH III	20	14.4444	23.3333	72.2222	80	71.1111	7.77778	5.5556	5.5556
	dsGFP + JH III	16.6667	20	26.6667	73.3333	70	66.6667	10	10	6.66667
	dsVegfr1 + JH III	3.33333	6.66667	16.6667	70	70	50	26.6667	23.3333	33.3333
	dsDrl + JH III	6.66667	10	13.3333	66.6667	56.6667	56.6667	26.6667	33.3333	30
	dsCad96ca + JH III	73.3333	60	70	20	30	20	6.66667	10	10
	dsNrk + JH III	83.3333	63.3333	73.3333	16.6667	30	16.6667	0	6.66667	10
	dsFgfr1 + JH III	63.3333	60	60	16.6667	30	26.6667	20	10	13.3333
	dsWsck + JH III	73.3333	66.6667	56.6667	16.6667	23.3333	26.6667	10	10	16.6667
