# Supplementary material for: Receptor tyrosine kinases CAD96CA and FGFR1 function as the cell membrane receptors of insect juvenile hormone
Source: eLife. 2025 Mar 14;13:RP97189. doi: 10.7554/eLife.97189 (PMC11908783; doi:10.7554/eLife.97189)
Supplement: Figure 2—source data 1. [file elife-97189-fig2-data1.xlsx]

## Sheet: Figure 2A
Figure 2A	time	DMSO			JH III			dsGFP + JH III			dsVegfr1 + JH III			dsDrl + JH III			dsCad96ca + JH III			dsNrk + JH III			dsFgfr1 + JH III			dsWsck + JH III
	6	1	1	1	1	1	1	1	1	1	1	1	1	1	1	1	1	1	1	1	1	1	1	1	1	1	1	1
	12	1.05	1.09091	0.955556	1	1	1.14094	1	1	1	1	1	1	1	1	1	1	1	1	1	0.973545	0.980132	0.995536	0.99569	1	0.992032	0.988593	0.992248
	18	1.05	1.09091	0.933333	1	1	1	1	0.971223	1	1	1	0.952381	1	0.987387	1	1	1	1	1	0.910053	0.966887	0.995536	0.99569	0.995434	0.996016	0.992395	0.988372
	24	0.95	1.04546	0.977778	1	1.06133	1	1	1	1	1	1	1	0.951807	1	1	1	1	1	0.946667	0.910053	1	0.995536	1	1	0.996016	0.992395	0.992248
	30	1.05	1	0.988889	1	1	1.14094	0.92887	1	1	1	0.988848	0.933948	1	0.972973	1	1	0.980392	1	1	0.907407	0.980132	1	1	1	0.996016	0.988593	0.992248
	36	1.05	1.09091	1	1	1	1	1	1	1	1	1	1	0.951807	0.964865	1	1	1	1	0.946667	0.920635	1	0.995536	1	0.995434	0.996016	0.992395	0.996124
	42	0.95	1.04546	0.977778	1	1.06133	1	1	0.971223	1	1	1	0.952381	1	0.987387	1	1	1	1	1	0.915344	0.980132	0.995536	1	0.995434	0.996016	0.992395	0.996124
	48	1	1	0.955556	1	1	1	0.92887	1	1	1	0.988848	1	1	1	1	1	0.980392	1	1	0.904762	1	0.995536	1	0.995434	0.996016	0.992395	0.992248
	54	1	1	0.955556	1	1	1	1	1	0.906736	1	1	0.952381	1	1	1	1	1	1	0.973333	0.957672	0.980132	0.995536	1	0.995434	1	0.992395	0.992248
	60	0.95	1.04546	0.977778	1	1	1	1	0.971223	1	1	0.988848	1	0.951807	0.972973	0.909938	1	0.931373	0.923077	1.06667	0.965608	0.980132	0.995536	1.00862	0.995434	0.996016	0.988593	0.988372
	66	1.05	0.954545	0.955556	1.27003	1.06133	1.14094	1.17992	1.00719	1	1	1	1.07988	1.03374	1.02523	1	1.00633	1.04412	1	1.14667	1.09524	1.18212	0.995536	1.01293	0.995434	1.01195	0.996198	0.996124
	72	1.05	0.954545	0.966667	1.45401	1.14933	1.29799	1.32636	1.20623	1.19689	1	1.1487	1.1828	1.09157	1.04054	1.16149	1.01266	1.09314	1.07692	1.15333	1.11376	1.21523	1.01339	1.02155	1	1.0239	1.00761	1.00775
	78	1	0.954545	1	1.46291	1.24267	1.29933	1.3682	1.21343	1.27461	1	1.1487	1.19816	1.11566	1.09009	1.18323	1.01899	1.09804	1.09717	1.16	1.12169	1.22185	1.04911	1.03017	1.0137	1.03586	1.02281	1.02713
	84	0.95	0.909091	0.955556	1.47181	1.37333	1.34228	1.41004	1.22782	1.33851	1	1.15613	1.20277	1.11807	1.1036	1.21118	1.02532	1.10294	1.12551	1.18	1.15079	1.17881	1.10268	1.04741	1.0274	1.05976	1.03802	1.05426
	90	0.95	0.909091	0.933333	1.47775	1.456	1.34631	1.42678	1.23501	1.35751	1.02392	1.16357	1.20891	1.19277	1.13063	1.21118	1.0443	1.10784	1.12956	1.18667	1.15873	1.20199	1.13393	1.06035	1.03653	1.06374	1.04563	1.07364
	96	1.15	1	0.977778	1.48071	1.45867	1.35436	1.4477	1.2494	1.37478	1.03828	1.18216	1.21044	1.20964	1.17477	1.21118	1.05696	1.11765	1.13765	1.20667	1.19312	1.19868	1.13839	1.07759	1.0411	1.08367	1.07224	1.0969
	102	1.15	1	0.988889	1.48665	1.45867	1.3557	1.43933	1.27098	1.39033	1.05742	1.1487	1.21813	1.21205	1.20991	1.25466	1.14557	1.13725	1.1417	1.22	1.20899	1.22185	1.16071	1.09483	1.04566	1.10359	1.07605	1.08915
	108	1.25	1	1	1.49555	1.47467	1.35973	1.45188	1.30935	1.39206	1.23923	1.19703	1.21659	1.22892	1.21802	1.25466	1.16456	1.15686	1.15789	1.24	1.22222	1.20199	1.1875	1.11638	1.0411	1.16335	1.11407	1.12403
	114	1.2	1	0.977778	1.51039	1.488	1.36779	1.46443	1.39568	1.4076	1.26794	1.23048	1.22888	1.24578	1.25405	1.26398	1.1962	1.17647	1.16599	1.26667	1.23016	1.22848	1.19643	1.12931	1.08219	1.16733	1.13308	1.13566
	120	1.15	1	0.955556	1.51335	1.49067	1.37181	1.4728	1.50753	1.41105	1.27273	1.2974	1.23349	1.27229	1.27117	1.28261	1.20886	1.19608	1.17409	1.29333	1.24603	1.23179	1.24554	1.17672	1.11872	1.18725	1.14068	1.13178
	126	1.15	1	0.955556	1.51335	1.488	1.36376	1.47699	1.39568	1.39206	1.26794	1.23048	1.2212	1.24096	1.25856	1.26087	1.18354	1.18137	1.17004	1.28667	1.21429	1.20861	1.28125	1.18103	1.12785	1.20717	1.1673	1.15116
	132	1.05	0.863636	0.977778	1.49852	1.488	1.35705	1.46025	1.30935	1.37478	1.23923	1.18959	1.21352	1.23615	1.24414	1.2764	1.17721	1.17647	1.16194	1.26	1.20106	1.18874	1.22321	1.18965	1.10959	1.20319	1.15209	1.13178
	138	1.2	1	0.955556	1.48665	1.47467	1.3557	1.45188	1.27098	1.35924	1.05742	1.171	1.19816	1.22651	1.21802	1.26398	1.16456	1.16667	1.15789	1.23333	1.2037	1.22517	1.17411	1.13362	1.10502	1.1753	1.13688	1.12791
	144	1.15	1	0.966667	1.48368	1.464	1.35302	1.43933	1.25899	1.35751	1.03828	1.16357	1.19508	1.21205	1.20991	1.25776	1.14557	1.15196	1.1498	1.20667	1.19048	1.21192	1.15625	1.09914	1.09589	1.16335	1.12928	1.11628
	150	1.2	1	0.933333	1.48071	1.46133	1.34631	1.4477	1.2494	1.3506	1.02392	1.15613	1.1828	1.20964	1.1964	1.25466	1.13291	1.14216	1.14575	1.19333	1.18519	1.17219	1.15625	1.05603	1.09132	1.15936	1.12548	1.1124
	156	1.1	1	0.966667	1.44807	1.456	1.34631	1.43515	1.24221	1.34542	1	1.15613	1.1828	1.2	1.17477	1.25155	1.12025	1.12745	1.13765	1.18667	1.17196	1.15563	1.15179	1.09483	1.07763	1.14343	1.12167	1.10853
	162	1	0.909091	0.955556	1.38279	1.38933	1.30067	1.42259	1.23981	1.3437	1.02392	1.1487	1.17972	1.19277	1.16757	1.18323	1.11392	1.12745	1.12956	1.16	1.16138	1.15894	1.07589	1.09052	1.06849	1.13147	1.10646	1.09302
	168	1	0.909091	0.944444	1.31454	1.33333	1.26309	1.39749	1.23261	1.33851	1.02392	1.1487	1.17972	1.18313	1.13063	1.18323	1.09494	1.10294	1.09717	1.15333	1.13492	1.13576	1.05357	1.06465	1.05023	1.11155	1.08365	1.08915
	174	1	0.909091	0.933333	1.24629	1.10667	1.24698	1.32636	1.22782	1.27461	1.02392	1.1487	1.07988	1.1759	1.1036	1.18323	1.06329	1.06863	1.07692	1.14667	1.11111	1.12583	1.03125	1.04741	1.03653	1.0996	1.07605	1.07364
	180	1	1	0.933333	1.15133	1.00267	1.12081	1.17992	1.20623	1.19689	1	0.988848	1	1.09157	1.09009	1	1.05696	1.04412	1.07692	1.06667	1.08466	1.11258	0.986607	1.02586	1.00457	1.06773	1.05323	1.04651
	186	1	0.909091	0.8	1.20772	1.29333	1.28993	1.12636	1.00719	1.17461	1.02392	1.15613	1.17972	1.11325	1.02523	1.18323	1.0443	1.12745	1.12146	1.14667	1.1164	1.18212	0.995536	1.01293	1.00457	1.06374	0.992395	0.996124
	192	1	0.909091	0.933333	1.36498	1.34667	1.3396	1.3682	1.20623	1.33851	1.05742	1.15613	1.17972	1.12289	1.02613	1.25155	1.08228	1.13725	1.12551	1.15333	1.12963	1.19868	1.02232	1.01724	1.00913	1.08765	1.0038	1
	198	1	0.909091	0.955556	1.45697	1.42933	1.34631	1.39331	1.21822	1.34197	1.05742	1.15985	1.17972	1.13253	1.04865	1.25776	1.11392	1.13725	1.12956	1.16	1.13492	1.18543	1.03571	1.03017	1.00913	1.10359	1.01141	1.0155
	204	1.1	0.909091	0.977778	1.45994	1.44267	1.35168	1.39749	1.22782	1.34888	1.05742	1.16357	1.1828	1.14699	1.09009	1.26398	1.12658	1.14216	1.13765	1.18667	1.15079	1.18212	1.05357	1.03879	1.01826	1.11155	1.01521	1.02713
	210	1.1	0.954545	0.977778	1.46291	1.448	1.35436	1.40167	1.23501	1.35751	1.05742	1.171	1.19816	1.1494	1.1036	1.26398	1.13291	1.14216	1.1417	1.22	1.16138	1.18212	1.05804	1.05172	1.03196	1.13147	1.03802	1.04651
	216	1.1	0.954545	1.01111	1.47775	1.456	1.35705	1.41004	1.2494	1.36097	1.03828	1.17844	1.20277	1.1759	1.10811	1.26708	1.16456	1.14706	1.14575	1.24	1.17725	1.2053	1.0625	1.07328	1.04566	1.14343	1.06844	1.06202
	222	1.15	0.954545	1.04444	1.48071	1.46133	1.35973	1.41841	1.26619	1.36615	1.02392	1.18216	1.21659	1.18313	1.1036	1.26398	1.16456	1.15196	1.1498	1.24667	1.18783	1.19868	1.08036	1.0819	1.07763	1.15936	1.06084	1.06202
	228	1.15	0.954545	1.04444	1.48665	1.46133	1.36376	1.42259	1.27098	1.37133	1.03828	1.18216	1.21813	1.2	1.13063	1.26708	1.17721	1.17647	1.15385	1.26	1.19312	1.18543	1.08929	1.12069	1.08219	1.1753	1.09886	1.08527
	234	1.15	0.954545	1.04444	1.49555	1.47467	1.36779	1.42678	1.30935	1.37306	1.03828	1.18959	1.2212	1.21687	1.17477	1.26398	1.17721	1.18137	1.15789	1.26667	1.20106	1.17219	1.10714	1.12069	1.08676	1.17928	1.10646	1.0969
	240	1.1	1.04546	1.03333	1.49852	1.48	1.36913	1.43096	1.30935	1.37478	1.05742	1.19331	1.22273	1.2241	1.20991	1.26087	1.1962	1.18627	1.15789	1.28667	1.21429	1.2053	1.17857	1.15517	1.09132	1.19522	1.11407	1.10853
	246	1.15	1.04546	1.02222	1.49852	1.48	1.36779	1.43515	1.30935	1.35924	1.05742	1.23048	1.21198	1.23133	1.1964	1.26708	1.18354	1.17157	1.16194	1.26	1.21429	1.21523	1.1875	1.19397	1.10046	1.19124	1.11407	1.12016
	252	1.2	1	1.03333	1.49852	1.47467	1.36779	1.43933	1.30935	1.35924	1.05742	1.23048	1.2212	1.23855	1.21261	1.26087	1.17721	1.18627	1.16599	1.22667	1.20106	1.2053	1.21429	1.18965	1.10959	1.1992	1.11407	1.1124
	258	1.2	1	1.03333	1.49852	1.47467	1.36779	1.43933	1.30935	1.3506	1.02392	1.23048	1.21044	1.24337	1.21802	1.26398	1.17721	1.17157	1.16599	1.22667	1.19048	1.18874	1.23661	1.18535	1.10046	1.19124	1.11787	1.12016
	264	1.15	0.954545	1.03333	1.49852	1.47467	1.36779	1.43096	1.30935	1.34888	1.03828	1.19703	1.21044	1.24578	1.25405	1.26398	1.18354	1.15196	1.1498	1.24667	1.19048	1.20861	1.24554	1.18535	1.10046	1.18725	1.09886	1.1124
	270	1.1	0.954545	1.04444	1.49852	1.47467	1.36779	1.43515	1.30935	1.36615	1.03828	1.19703	1.21813	1.24096	1.25856	1.26708	1.17721	1.16176	1.15385	1.26667	1.19312	1.19868	1.22768	1.18103	1.09132	1.18725	1.11027	1.11628
	276	1.15	1	1.06667	1.49852	1.47467	1.36779	1.43933	1.30935	1.35233	1.05742	1.19703	1.21659	1.24578	1.25405	1.26398	1.18354	1.16176	1.1498	1.23333	1.18783	1.17219	1.21875	1.17672	1.08676	1.18725	1.11407	1.1124
	282	1.15	0.909091	1.08889	1.49852	1.47467	1.36779	1.43933	1.30935	1.35233	1.02392	1.19703	1.22888	1.24096	1.25856	1.26398	1.16456	1.17157	1.14575	1.20667	1.20899	1.15563	1.22321	1.17672	1.08676	1.19124	1.10646	1.10853
	288	1.1	0.954545	1.07778	1.49852	1.47467	1.36779	1.43096	1.30935	1.34542	1.03828	1.16729	1.23349	1.22892	1.25405	1.26708	1.16456	1.16176	1.16599	1.23333	1.1746	1.15894	1.21875	1.1681	1.09132	1.19124	1.10266	1.10853
	294	1.15	1	1.08889	1.48665	1.47467	1.36779	1.43515	1.30935	1.35751	1.03828	1.17472	1.2212	1.21687	1.25856	1.26708	1.18354	1.15686	1.1498	1.24	1.17196	1.17881	1.21429	1.17672	1.09132	1.19124	1.10646	1.1124
	300	1.25	1	1.11111	1.48665	1.464	1.36779	1.43933	1.30935	1.3506	1.05742	1.17844	1.21352	1.24337	1.25045	1.26087	1.17721	1.17647	1.14575	1.22	1.2037	1.1755	1.21429	1.16379	1.08219	1.17928	1.10646	1.10853
	306	1.2	1.04546	1.07778	1.49852	1.47467	1.36779	1.43933	1.30935	1.34888	1.02392	1.17844	1.21198	1.23615	1.24414	1.26708	1.17721	1.16176	1.14575	1.26	1.19841	1.18874	1.21875	1.15948	1.08676	1.18725	1.10266	1.10853
	312	1.25	1	1.05556	1.48665	1.49067	1.36779	1.43096	1.30935	1.36615	1.03828	1.18959	1.2212	1.22651	1.25045	1.26087	1.18354	1.15686	1.1498	1.24	1.20899	1.15894	1.19196	1.1681	1.08676	1.19124	1.10266	1.1124
	318	1.15	1.04546	1.06667	1.49852	1.464	1.36779	1.43515	1.30935	1.35233	1.03828	1.171	1.21044	1.23133	1.24414	1.26398	1.17721	1.15686	1.16194	1.22667	1.17725	1.17881	1.19196	1.18103	1.08676	1.19124	1.10266	1.10465
	324	1.2	0.954545	1.06667	1.48665	1.47467	1.36779	1.43933	1.30935	1.35233	1.05742	1.17844	1.21044	1.23133	1.25045	1.26398	1.18354	1.17647	1.15789	1.24667	1.18519	1.18874	1.20089	1.16379	1.08676	1.18327	1.10266	1.10853
	330	1.15	1.04546	1.06667	1.49852	1.47467	1.36779	1.43933	1.30935	1.34542	1.02392	1.17472	1.21813	1.21205	1.24414	1.26708	1.16456	1.16176	1.15385	1.26667	1.18783	1.20861	1.19643	1.17672	1.08676	1.17928	1.11027	1.1124
	336	1.15	1	1.07778	1.49852	1.464	1.36779	1.43096	1.30935	1.35751	1.03828	1.18959	1.21659	1.23855	1.25045	1.26398	1.16456	1.15686	1.14575	1.23333	1.17196	1.19868	1.20089	1.18103	1.08219	1.18725	1.11407	1.1124
	342	1.15	1.04546	1.08889	1.49852	1.47467	1.36779	1.43515	1.30935	1.3506	1.03828	1.171	1.22888	1.22892	1.25045	1.26398	1.18354	1.17157	1.13765	1.24	1.16138	1.17219	1.20089	1.16379	1.08219	1.1753	1.09886	1.10465
	348	1.15	0.954545	1.1	1.49852	1.46133	1.36779	1.43933	1.30935	1.34888	1.05742	1.171	1.23349	1.20964	1.25045	1.26708	1.17721	1.15196	1.16194	1.23333	1.19312	1.15563	1.20089	1.17672	1.07763	1.19124	1.09886	1.10853
	354	1.15	0.954545	1.08889	1.49852	1.46133	1.36779	1.43933	1.30935	1.36615	1.02392	1.18959	1.2212	1.18313	1.21802	1.26708	1.17721	1.16176	1.16194	1.24	1.18783	1.15894	1.20089	1.17241	1.07763	1.1753	1.09506	1.10465
	360	1.1	0.954545	1.12222	1.49852	1.46133	1.36779	1.43096	1.30935	1.35233	1.03828	1.18216	1.21352	1.18313	1.21261	1.26087	1.18354	1.16176	1.14575	1.22	1.20899	1.17881	1.19196	1.1681	1.07306	1.17928	1.09506	1.10465
	366	1.1	0.954545	1.12222	1.49852	1.46133	1.36779	1.43515	1.30935	1.35233	1.03828	1.17472	1.21198	1.1759	1.21802	1.26708	1.17721	1.17157	1.1417	1.26	1.1746	1.1755	1.1875	1.15948	1.07763	1.17928	1.09506	1.10465
	372	1.15	0.909091	1.13333	1.49852	1.46133	1.36376	1.43933	1.30935	1.34542	1.05742	1.16729	1.2212	1.1494	1.21261	1.26087	1.18354	1.16176	1.13765	1.24	1.17196	1.18874	1.19643	1.15948	1.07763	1.18725	1.09886	1.10853
	378	1.15	1	1.1	1.49852	1.456	1.36376	1.43933	1.30935	1.35751	1.02392	1.17472	1.21044	1.13253	1.21802	1.26398	1.16456	1.15686	1.1498	1.22667	1.2037	1.15894	1.17857	1.16379	1.07763	1.18327	1.09886	1.10853
	384	1.05	1	1.11111	1.49852	1.456	1.36376	1.43096	1.30935	1.3506	1.03828	1.17844	1.21044	1.14699	1.21261	1.26398	1.16456	1.17647	1.14575	1.24667	1.19841	1.16556	1.17411	1.16379	1.07763	1.17928	1.09506	1.10853
	390	1.1	1	1.12222	1.48071	1.456	1.36376	1.43515	1.30935	1.34888	1.03828	1.17844	1.21813	1.13976	1.21802	1.26708	1.18354	1.16176	1.15385	1.26667	1.20899	1.16225	1.17411	1.16379	1.07763	1.17132	1.09126	1.10465
	396	1.15	1	1.12222	1.48071	1.456	1.36376	1.43933	1.30935	1.36615	1.05742	1.171	1.21659	1.11566	1.21261	1.26398	1.17721	1.15686	1.1498	1.23333	1.17725	1.1755	1.17411	1.16379	1.07763	1.15538	1.09126	1.10853
	402	1.05	0.954545	1.13333	1.48071	1.44267	1.36376	1.43933	1.30935	1.35233	1.02392	1.171	1.22888	1.11807	1.21802	1.26398	1.17721	1.15686	1.14575	1.24	1.18519	1.15894	1.17857	1.16379	1.07306	1.16733	1.09126	1.10465
	408	1.1	1	1.11111	1.47775	1.44267	1.36376	1.43096	1.30935	1.35233	1.03828	1.17844	1.23349	1.10843	1.21261	1.26708	1.18354	1.17647	1.16194	1.23333	1.18783	1.13576	1.17411	1.17241	1.07763	1.15139	1.09506	1.10465
	414	1.1	1	1.13333	1.47775	1.44267	1.36376	1.43515	1.30935	1.34542	1.03828	1.18216	1.2212	1.11807	1.21802	1.26708	1.17721	1.16176	1.16194	1.24	1.17196	1.15894	1.16964	1.18103	1.06849	1.15538	1.09506	1.10465
	420	1.05	1	1.12222	1.47775	1.44267	1.36376	1.43933	1.30935	1.35751	1.05742	1.18959	1.21352	1.12289	1.21261	1.26087	1.18354	1.15686	1.15789	1.22	1.16138	1.13576	1.16964	1.1681	1.07306	1.15936	1.07985	1.10465

## Sheet: Figure 2B
Figure 2B		dsGFP+JH III									dsRtk+JH III
	Vegfr1	0.939523	0.846745	1.25701	1.05946	0.890899	1.05946	1.31039	1	0.76313	0.403321	0.190782	0.243164	0.204949	0.344681	0.225834	0.459032	0.218646	0.394109
	Drl	0.819794	1.40769	0.866537	1.10701	0.850667	1.06191	0.954842	0.922316	1.1355	0.0339605	0.0291573	0.0960547	0.0339605	0.034674	0.0334929	0.0633725	0.0463914	0.0532897
	Cad96ca	0.850667	0.911722	1.28937	0.723635	1.47768	0.935191	0.831238	0.948246	1.26868	0.23871	0.180909	0.245421	0.106579	0.222211	0.262429	0.323088	0.397768	0.582367
	Nrk	1.14605	0.943874	0.92445	0.884745	0.974905	1.15936	0.959264	0.946058	1.10191	0.283876	0.152125	0.180909	0.134282	0.0792928	0.123564	0.0106476	0.0140495	0.0100036
	Fgfr1	1.13027	0.880666	1.00463	1.46409	0.846745	0.806642	1.35035	1.26868	0.583714	0.523647	0.512871	0.380684	0.218141	0.274206	0.197967	0.025383	0.022718	0.027017
	Wsck	1.35035	0.915945	0.808508	0.937354	0.880666	1.21139	0.935191	0.961483	1.11214	0.347078	0.212176	0.349492	0.141284	0.217135	0.087575	0.36942	0.270431	0.308498

## Sheet: Figure 2C
Figure 2C		p-TAI/TAI
	DMSO	0.288756	0.051703	0.078144
	JH III	2.00322	1.47826	1.23358
	dsGFP + JH III	1.85046	1.23298	2.11204
	dsVegfr1 + JH III	1.8021	1.08285	2.0754
	dsDrl + JH III	1.22359	1.00588	1.60108
	dsCad96ca + JH III	0.291505	0.16956	0.47801
	dsNrk + JH III	0.307624	0.202069	0.105958
	λPPase + JH III	0.234055	0.093713	0.206086
	dsFgfr1 + JH III	0.632531	0.070993	0.239651
	dsWsck + JH III	2.12483	0.951415	1.65583
		p-MET1/MET1
	DMSO	0.258644	0.084746	0.135423
	JH III	1.10516	0.74009	1.37454
	dsGFP + JH III	0.94897	0.85359	1.20236
	dsVegfr1 + JH III	0.766205	1.31782	0.850992
	dsDrl + JH III	0.803068	1.47404	0.783106
	dsCad96ca + JH III	0.291698	0.552552	0.491006
	dsNrk + JH III	0.304818	0.559173	0.574091
	λPPase + JH III	0.226402	0.3467	0.335231
	dsFgfr1 + JH III	0.274415	0.257862	0.152163
	dsWsck + JH III	0.879395	0.753163	0.462264
