# Supplementary material for: Receptor tyrosine kinases CAD96CA and FGFR1 function as the cell membrane receptors of insect juvenile hormone
Source: eLife. 2025 Mar 14;13:RP97189. doi: 10.7554/eLife.97189 (PMC11908783; doi:10.7554/eLife.97189)
Supplement: Figure 3—figure supplement 1—source data 1. [file elife-97189-fig3-figsupp1-data1.xlsx]

## Sheet: Figure 3–figure supplement 1C
Figure 3–figure supplement 1C	Ligand concentration (M)	3.0518e-11	6.1035e-11	1.2207e-10	2.44141e-10	4.88281e-10	9.76562e-10	1.95312e-09	3.90625e-09	7.8125e-09	1.5625e-08	3.125e-08	6.25e-08	1.25e-07	2.5e-07	5e-07	1e-06
	MET1-CopGFP-His+JH III	1.3817	1.28329	1.21003	0.872474	0.493001	0.474	0.297365	1.47736	3.39262	5.24087	13.7053	24.2368	32.9291	32.1887	31.9359	33.2345
		-1.49722	-0.0778884	1.57497	3.1224	-2.35307	0.73524	4.28835	8.66635	7.60217	21.4337	21.978	29.5576	30.1054	29.711	29.5787	30.2989
		-0.747304	-0.896757	0.707239	-1.4228	0.545925	-0.716105	3.83455	8.41111	1.47938	3.66853	8.01484	19.9212	29.8408	29.9787	28.5019	30.1032
	CopGFP-His+JH III	0.43959	0.609272	0.115603	-0.532306	0.583173	-1.06584	-1.22626	0.133383	-0.914037	1.31425	0.771021	-0.18203	-1.23797	-0.39444	-1.08916	-0.514258
		-0.400852	0.530003	0.137825	0.714496	-0.924619	-0.449461	1.36395	-0.312122	-0.592717	0.00566311	-1.23203	-1.23213	2.22677	-2.19471	-1.25004	0.904006
		0.682817	-0.0753527	0.0890583	0.330102	-0.215657	-0.231299	-0.349949	-0.258923	0.512749	-0.1643	-0.198877	-0.123817	0.497057	-0.215332	0.954748	0.281098
