# Supplementary material for: Receptor tyrosine kinases CAD96CA and FGFR1 function as the cell membrane receptors of insect juvenile hormone
Source: eLife. 2025 Mar 14;13:RP97189. doi: 10.7554/eLife.97189 (PMC11908783; doi:10.7554/eLife.97189)
Supplement: Figure 3—figure supplement 2—source data 1. [file elife-97189-fig3-figsupp2-data1.xlsx]

## Sheet: Figure 3–figure supplement 2A
Figure 3–figure supplement 2A
CAD96CA-CopGFP-His	Molar Ratio	1.69901	3.13011	4.57508	6.03393	7.50664	8.99321	10.4937	12.008	13.5362	15.0782	16.6341	18.2039	19.7876	21.3851	22.9965	24.6217	26.2609	27.9138
	ΔH (KJ/mol)	-331.666	-345.942	-348.46	-296.805	-242.488	-159.265	-78.5755	-22.6591	-3.74051	8.48603	-5.78859	24.1188	6.40281	19.847	14.5772	7.40772	-2.86914	-0.630723

## Sheet: Figure 3–figure supplement  2B
Figure 3–figure supplement 2B
FGFR1-CopGFP-His	Molar Ratio	1.69901	3.13011	4.57508	6.03393	7.50664	8.99321	10.4937	12.008	13.5362	15.0782	16.6341	18.2039	19.7876	21.3851	22.9965	24.6217	26.2609	27.9138
	ΔH (KJ/mol)	-219.129	-223.279	-204.864	-158.958	-68.8294	-30.6687	-18.6778	-8.33461	-1.24292	-3.99431	-15.5662	2.59018	-1.31707	-2.54819	-2.37896	13.0268	-1.70672	9.06508

## Sheet: Figure 3–figure supplement 2C
Figure 3–figure supplement 2C
NRK-CopGFP-His	Molar Ratio	1.69901	3.13011	4.57508	6.03393	7.50664	8.99321	10.4937	12.008	13.5362	15.0782	16.6341	18.2039	19.7876	21.3851	22.9965	24.6217	26.2609	27.9138
	ΔH (KJ/mol)	-2.26598	-6.61814	-0.942923	-4.14354	-3.19764	-2.87017	-2.31897	-2.39968	-5.09869	-5.53425	-43.915	-7.15274	-1.85052	-5.69204	-3.76834	-5.80403	-3.605	-3.33256

## Sheet: Figure 3–figure supplement 2D
Figure 3–figure supplement 2D
OTK-CopGFP-His	Molar Ratio	1.69901	3.13011	4.57508	6.03393	7.50664	8.99321	10.4937	12.008	13.5362	15.0782	16.6341	18.2039	19.7876	21.3851	22.9965	24.6217	26.2609	27.9138
	ΔH (KJ/mol)	-4.52646	-3.8158	-3.87773	-3.25603	-3.43319	-3.66932	-3.31096	-3.08179	-4.82717	-3.83734	-3.24892	-2.64878	-2.86697	-2.13165	-2.46534	-3.26815	-3.69473	-4.42348
