# Supplementary material for: Receptor tyrosine kinases CAD96CA and FGFR1 function as the cell membrane receptors of insect juvenile hormone
Source: eLife. 2025 Mar 14;13:RP97189. doi: 10.7554/eLife.97189 (PMC11908783; doi:10.7554/eLife.97189)
Supplement: Figure 3—source data 1. [file elife-97189-fig3-data1.xlsx]

## Sheet: Figure 3C
Figure 3C	Ligand concentration (M)	3.0518e-11	6.1035e-11	1.2207e-10	2.44141e-10	4.88281e-10	9.76562e-10	1.95312e-09	3.90625e-09	7.8125e-09	1.5625e-08	3.125e-08	6.25e-08	1.25e-07	2.5e-07	5e-07	1e-06
	CAD96CA-CopGFP-His+DMSO	0.42765	-0.137636	-0.00351722	0.171225	-0.347878	-0.480984	-0.379604	0.68594	0.1604	-0.346962	0.111159	0.10221	0.773734	-0.108511	-0.165721	0.941311
		0.773208	0.555142	0.179772	0.242882	-0.209256	-0.293949	-0.942512	0.381233	-0.743325	-0.863264	1.66125	-1.55384	-0.130706	0.820117	-1.12469	-0.359259
		-0.125392	0.192979	0.537727	0.551389	-0.353813	-0.597953	-1.85552	0.44823	-0.182395	3.77522	-0.514216	-0.104887	-1.15938	-0.812086	-0.00700064	0.54451
	CAD96CA-CopGFP-His+JH III	1.68047	-0.145578	0.11057	0.56946	-0.836439	-0.289612	0.435384	3.00556	6.38603	10.641	21.22	34.1081	34.0346	33.8628	34.5075	34.0574
		-0.324272	0.16653	-0.751957	0.287352	0.82811	0.257422	2.16331	2.18077	6.18956	10.8489	21.3887	32.1241	33.5737	33.7626	30.707	32.6308
		2.54207	-0.247458	-0.868729	0.752895	-0.796666	1.11195	0.6929	1.48766	1.08737	1.786	6.84902	16.4059	23.7396	23.9495	23.8215	22.4867
	FGFR1-CopGFP-His+DMSO	0.353978	0.585424	-0.583852	0.234969	1.33443	0.156964	0.396179	0.192093	-1.08635	-0.382959	-0.193904	-0.437444	-0.587693	-0.118766	0.888068	0.615708
		3.07393	-0.566404	-0.994458	0.845487	1.34109	0.0363185	1.28611	0.703502	1.6492	-2.9821	-2.35834	0.831124	-1.06451	-1.49016	-0.429155	2.07182
		-2.04186	-1.16793	4.52173	-1.37143	-2.93902	-0.939235	-2.01128	-2.19882	-1.34159	-3.6469	-2.80407	2.77572	-2.47337	-3.97565	-7.43194	1.93436
	FGFR1-CopGFP-His+JH III	0.287971	0.399212	-0.0382417	0.458986	-0.229938	0.0580984	0.513051	-0.544425	1.32066	3.0673	6.12091	11.208	21.3074	27.6467	28.2182	27.7881
		0.619342	0.883622	0.685935	0.191684	-0.676933	0.0318351	1.4399	2.19986	3.40458	9.25206	18.5764	26.0946	25.0009	25.8747	26.1998	26.347
		0.943371	-0.300441	-0.183632	0.97381	-0.420115	0.0577494	3.33931	4.08044	9.6326	17.5406	25.1851	24.8396	25.6923	24.5085	24.3152	25.1254
	NRK-CopGFP-His+DMSO	-1.83018	6.99073	-0.123535	-1.89582	-4.5016	0.586547	-3.76194	1.8804	-0.792454	4.64892	-3.81426	-3.71792	-3.83695	0.763626	-1.2013	-2.16025
		-0.504192	-1.59388	0.676058	2.04674	-1.53227	-1.52575	2.74701	2.47276	1.84479	-0.610814	5.20771	-3.10085	27.8097	1.58605	-2.02936	12.4001
		6.46099	-2.13128	-2.95301	1.58396	-3.50059	-2.07713	2.21791	-0.595952	-1.47589	-1.64828	-1.72283	-1.99922	-3.39366	-0.612358	-4.13329	-0.576603
	NRK-CopGFP-His+JH III	0.782819	-0.355175	2.97281	0.893375	0.980426	-0.369283	-0.537144	2.69202	-6.34812	-5.32482	-1.55836	-5.97699	-0.790985	-1.45864	-1.52793	-3.63752
		-0.885884	0.0699222	-1.04231	-1.48959	0.895501	0.116321	1.15884	0.72778	0.988371	1.5585	0.299537	0.440174	3.01753	3.59103	2.2072	1.20359
		0.634598	-1.94382	0.825812	0.258583	0.545706	-1.60118	2.18843	0.348433	0.487205	0.763989	-0.331763	-0.0258567	1.44285	-2.44269	2.36762	4.75141
	OTK-CopGFP-His+DMSO	5.5959	-1.14806	0.603905	0.213976	-1.75349	0.594122	-0.920472	-2.06134	-0.163237	0.472559	-1.19308	-0.294525	1.87941	3.69499	2.00623	-0.891781
		0.37002	-1.6353	-0.168221	-0.0772251	0.557618	-0.187602	0.296665	-0.275383	0.7056	0.434397	0.647451	0.442467	0.00734887	-0.952101	2.13911	0.0495483
		0.240225	-0.235642	-0.402871	3.38554	-0.0349672	1.60915	1.01705	0.183365	-0.504176	-0.681942	-0.0345895	0.328415	-0.793768	-1.76131	-3.04902	4.69379
	OTK-CopGFP-His+JH III	0.25265	-1.83641	1.12629	1.74614	0.612835	0.598252	1.58095	1.91433	8.40509	1.2499	2.89161	3.96632	3.46472	6.42755	5.69767	5.54334
		0.178546	-2.06014	-1.76911	-0.422774	2.27549	-0.0345305	-2.465	0.764556	0.426967	3.42717	1.56979	-0.908154	0.384182	0.60622	2.91254	1.76015
		-0.162472	-2.56813	-2.70215	-2.93719	0.589362	3.92225	3.42075	-0.876924	-0.302022	2.48968	-0.731539	-1.61082	1.43743	-1.91633	-1.42057	-2.72231

## Sheet: Figure 3D
Figure 3D	Ligand concentration (M)	3.05176e-10	6.10352e-10	1.2207e-09	2.44141e-09	4.88281e-09	9.76563e-09	1.95313e-08	3.90625e-08	7.8125e-08	1.5625e-07	3.125e-07	6.25e-07	1.25e-06	2.5e-06	5e-06	1e-05
	CAD96CA-CopGFP-His+Farnesol	-0.884778	-0.631191	0.578238	-0.506684	-0.361475	-0.146455	-0.254884	1.18335	0.476553	1.4011	1.46434	-1.69827	1.57314	2.37151	1.60139	2.95634
		-0.416694	0.801083	0.30141	0.42204	0.157231	0.865878	-1.45364	-0.181018	0.188699	-0.869594	0.419087	-0.118796	1.48656	1.39407	-0.335181	2.10368
		0.915513	1.4893	-1.33902	-0.697142	0.390865	0.2107	0.724657	0.734048	1.75019	-1.82361	-0.666232	1.88339	4.54528	6.92699	6.79731	1.81156
	CAD96CA-CopGFP-His+Methoprene	3.15198	0.310276	-0.415965	0.65915	-3.60817	-1.56739	-1.24863	-0.847011	8.4535	-0.426074	0.946423	3.29664	3.78342	7.30739	7.28789	4.57286
		0.940157	1.20547	-0.0517376	0.132591	0.158069	-0.884967	0.301754	0.301204	2.95482	2.6463	7.0076	3.28564	5.82946	8.14884	5.86019	4.07897
		1.23724	1.36021	-0.287665	-0.748441	0.0338123	-0.910036	1.03549	-0.733667	-0.197996	1.22534	1.63575	2.87947	2.06278	6.25318	5.95515	3.23002
	CAD96CA-CopGFP-His+MF	0.330697	0.215639	0.501674	0.57652	0.309696	-0.846317	1.03263	0.617217	-0.0139337	0.404069	2.98174	4.00427	8.42148	6.61578	4.49506	6.82601
		0.360341	2.91342	0.102286	0.318468	-0.420574	-1.13138	0.72104	-1.18693	-1.01265	1.7203	1.4177	2.76966	5.64229	5.22016	5.16808	5.09406
		0.843078	0.361328	0.927283	-0.606647	1.01171	-1.0625	-0.733471	0.699433	0.718286	1.65971	1.54664	4.26786	6.58344	6.22786	6.54129	6.13013
	CAD96CA-CopGFP-His+JH III	1.66995	-0.1561	0.100047	0.558937	-0.846962	-0.300135	0.424861	2.99504	6.37551	10.6304	21.2095	34.0976	34.0241	33.8523	34.4969	34.0468
		2.91194	0.122418	-0.498853	1.12277	-0.426789	1.48183	1.06278	1.85754	1.45725	2.15587	7.2189	16.7758	24.1094	24.3194	24.1913	22.8565
		3.34209	5.22778	-2.20793	-2.79566	0.12986	-0.168738	1.62728	0.504023	2.14033	5.59416	6.56112	16.9916	21.9715	34.0316	33.3905	22.8784

## Sheet: Figure 3E
Figure 3E	Ligand concentration (M) JH III	1.2207e-11	2.44141e-11	4.88281e-11	9.76562e-11	1.95312e-10	3.90625e-10	7.8125e-10	1.5625e-09	3.125e-09	6.25e-09	1.25e-08	2.5e-08	5e-08	5e-08	5e-08	5e-08
	Ligand concentration (M) Methoprene	3.05176e-10	6.10352e-10	1.2207e-09	2.44141e-09	4.88281e-09	9.76563e-09	1.95313e-08	3.90625e-08	7.8125e-08	1.5625e-07	3.125e-07	6.25e-07	1.25e-06	2.5e-06	5e-06	1e-05
	CAD96CA-CopGFP-His+JH III+Methoprene	0.548396	0.0961294	0.0788638	-0.42445	-0.284095	0.383651	-0.043436	1.32145	2.3959	3.81023	5.5298	5.25135	9.83102	9.5883	11.8374	9.61217
		-0.413232	-2.1535	-1.22391	3.46141	6.20551	-1.40566	-1.73406	0.0449715	-1.33044	3.86967	1.55657	5.30338	9.82689	8.99544	9.77507	9.01373
		-0.0148225	0.395775	0.66883	1.02824	-0.635608	0.210615	3.05206	2.23108	3.65938	10.761	4.05631	12.3582	11.0042	11.5774	9.61338	5.26843
	CAD96CA-CopGFP-His+Methoprene	3.15198	0.310276	-0.415965	0.65915	-3.60817	-1.56739	-1.24863	-0.847011	8.4535	-0.426074	0.946423	3.29664	3.78342	7.30739	7.28789	4.57286
		-1.24618	-0.409317	-0.270845	0.298555	-1.56825	1.02785	-0.202791	0.408125	0.934996	-0.582702	2.19634	1.59757	1.92382	3.58602	5.15173	14.0496
		0.940157	1.20547	-0.0517376	0.132591	0.158069	-0.884967	0.301754	0.301204	2.95482	2.6463	7.0076	3.28564	5.82946	8.14884	5.86019	4.07897

## Sheet: Figure 3F
Figure 3F	Ligand concentration (M)	3.05176e-10	6.10352e-10	1.2207e-09	2.44141e-09	4.88281e-09	9.76563e-09	1.95313e-08	3.90625e-08	7.8125e-08	1.5625e-07	3.125e-07	6.25e-07	1.25e-06	2.5e-06	5e-06	1e-05
	FGFR1-CopGFP-His+Farnesol	-0.346477	0.967866	0.580267	-0.716069	-0.702595	-1.18526	1.78565	1.17934	0.992457	0.000860837	-0.800563	-1.28939	1.85647	0.826433	-0.563845	0.699768
		-0.926011	-0.381452	1.16422	-0.400754	-0.603012	-0.713088	1.41982	0.843824	0.168416	-1.43641	-0.496614	-0.208479	-0.996509	-1.06697	1.56619	-1.2134
		0.272413	0.885024	-0.224224	0.0427509	1.67857	0.478458	-0.482812	-0.601738	-0.571193	-0.295824	0.346096	-0.354164	-0.744338	1.48986	2.79309	4.25359
	FGFR1-CopGFP-His+Methoprene	-0.190408	0.124905	0.176108	-0.0897085	-0.0654502	0.777374	0.76237	0.64218	-0.833569	0.528031	3.16324	3.13504	3.57012	4.91738	3.4543	5.04101
		-0.652902	-0.567385	-0.828397	1.03825	-0.131844	1.35619	0.394076	-0.363743	0.362359	-0.364643	1.26167	1.76863	2.5763	2.59042	3.78465	5.05527
		1.63734	0.532528	0.986431	0.946052	-1.36739	0.801893	1.69548	-1.92485	-1.01743	-0.392891	-0.882804	2.84715	5.41523	5.78648	5.81087	2.46628
		-0.058194	0.071265	0.868262	1.59694	0.11457	-0.438392	0.242571	1.50625	0.648696	6.58232	7.05612	3.45517	6.05778	6.24727	5.15488	4.72556
	FGFR1-CopGFP-His+MF	1.12024	0.531621	0.824871	-0.905037	0.551294	-0.68475	-0.42571	-0.13821	0.898046	1.08465	0.405211	2.75157	5.98049	5.20019	5.62024	6.30974
		1.36433	0.571191	0.245683	-0.351879	0.212031	-0.183276	0.87367	-1.10853	0.538766	1.6156	4.93028	3.47504	6.12247	6.47689	4.28726	4.62584
		-0.572179	-0.107421	-0.0398643	2.25902	-0.450383	-0.0781119	0.725643	-0.490658	1.01149	-0.6234	1.72385	3.18701	4.57841	6.22786	6.03242	7.00658
	FGFR1-CopGFP-His+JH III	0.770897	0.882138	0.444684	0.941912	0.252988	0.541024	0.995977	-0.0614987	1.80359	3.55023	6.60384	11.6909	21.7903	28.1296	28.7012	28.271
		0.453072	0.717353	0.519666	0.0254145	-0.843202	-0.134434	1.27363	2.03359	3.23831	9.08579	18.4101	25.9283	24.8346	25.7084	26.0336	26.1808
		2.12968	2.03135	2.01365	1.44883	1.80733	-1.94757	0.406704	-0.668852	0.00260441	2.27566	3.8381	10.6284	20.9939	26.0774	25.7691	25.7413

## Sheet: Figure 3G
Figure 3G	Ligand concentration (M) JH III	1.2207e-11	2.44141e-11	4.88281e-11	9.76562e-11	1.95312e-10	3.90625e-10	7.8125e-10	1.5625e-09	3.125e-09	6.25e-09	1.25e-08	2.5e-08	5e-08	5e-08	5e-08	5e-08
	Ligand concentration (M) Methoprene	3.05176e-10	6.10352e-10	1.2207e-09	2.44141e-09	4.88281e-09	9.76563e-09	1.95313e-08	3.90625e-08	7.8125e-08	1.5625e-07	3.125e-07	6.25e-07	1.25e-06	2.5e-06	5e-06	1e-05
	FGFR1-CopGFP-His+JH III+Methoprene	-0.608769	0.134756	0.783126	-0.354265	-0.00428525	-0.177742	0.372953	-0.0152847	0.0807203	1.08011	1.40287	1.70734	5.15761	4.63011	9.18944	9.88426
		-1.00128	0.511613	-0.111913	-0.540172	-0.309895	-1.23322	-2.43158	-0.553717	0.795228	6.75107	5.80196	2.09304	4.41575	6.675	8.92567	11.0409
		0.0097443	-0.421944	0.0432883	-0.244875	0.180046	2.23248	-2.00298	2.60957	2.56176	-0.601329	0.675886	6.28091	7.38389	8.17521	7.3255	-1.02819
		2.30593	0.321808	1.56728	-2.29591	2.48631	-0.343239	-0.369894	-0.777569	-0.692115	3.99376	6.6317	6.837	9.48723	4.59021	5.98792	8.45316
		5.48174	0.0570166	0.589193	0.652093	-0.298505	-0.161806	-3.37968	1.25568	0.260755	-2.51033	-0.636214	1.93688	6.15855	6.30992	7.4245	4.7404
	FGFR1-CopGFP-His+Methoprene	-0.711053	-0.754598	-0.570661	1.44352	0.105209	0.276029	1.79088	-0.651101	-0.564773	0.409859	0.156944	0.602955	3.60318	1.6821	3.90794	4.85131
		-0.652902	-0.567385	-0.828397	1.03825	-0.131844	1.35619	0.394076	-0.363743	0.362359	-0.364643	1.26167	1.76863	2.5763	2.59042	3.78465	5.05527
		1.63734	0.532528	0.986431	0.946052	-1.36739	0.801893	1.69548	-1.92485	-1.01743	-0.392891	-0.882804	2.84715	5.41523	5.78648	5.81087	2.46628
		-0.058194	0.071265	0.868262	1.59694	0.11457	-0.438392	0.242571	1.50625	0.648696	6.58232	7.05612	3.45517	6.05778	6.24727	5.15488	4.72556

## Sheet: Figure 3H
Figure 3H	Ligand concentration (M)	3.0518e-11	6.1035e-11	1.2207e-10	2.44141e-10	4.88281e-10	9.76562e-10	1.95312e-09	3.90625e-09	7.8125e-09	1.5625e-08	3.125e-08	6.25e-08	1.25e-07	2.5e-07	5e-07	1e-06
	CAD96CA-CopGFP-His+JH III	3.34209	5.22778	-2.20793	-2.79566	0.12986	-0.168738	1.62728	0.504023	2.14033	5.59416	6.56112	16.9916	21.9715	34.0316	33.3905	22.8784
		0.878931	-0.723112	-1.08212	0.953321	0.687576	2.6888	2.10112	0.316714	4.11147	5.75407	11.7651	20.0089	33.6678	32.031	36.6176	33.2083
		0.970952	0.623766	0.412451	-4.42774	0.133723	3.86914	4.39965	0.622089	2.92566	7.19043	12.633	17.8339	36.9806	38.4909	38.2217	39.3644
	CAD96CA-M1-CopGFP-His+JH III	0.375378	-1.5399	0.729332	2.62146	0.851858	1.53175	2.53831	2.00783	-0.638383	3.88018	6.54917	14.6598	21.4601	37.4102	34.3346	26.5554
		1.12275	0.231931	1.05141	1.61826	-4.01099	4.2634	0.302281	4.29203	2.08808	7.94774	10.5242	23.8153	37.7854	36.1477	26.5867	23.1086
		0.656207	-0.678052	0.143873	-0.212754	2.01507	1.42636	1.87393	0.78589	2.44996	3.96504	10.5798	18.4174	30.1966	32.1055	29.9267	40.4351
	CAD96CA-M2-CopGFP-His+JH III	3.75127	2.9522	-3.00226	0.0159055	-0.208491	0.437732	0.630544	0.647862	1.49672	0.996425	5.22644	8.61413	20.7305	15.4073	14.4029	13.0469
		2.50638	-0.410194	2.33328	-0.94192	-0.26118	-2.23998	-0.410172	-0.550284	3.22724	1.35145	6.00391	10.9625	11.2093	9.52134	6.98522	0.709445
		-0.584662	-0.309549	0.427686	-1.04513	0.152751	1.32302	0.0372176	0.799457	3.1624	1.72231	5.08443	8.57082	9.82143	11.537	0.646919	15.9318
	CAD96CA-M3-CopGFP-His+JH III	1.95182	-0.226576	0.859787	-0.337889	-0.465989	-0.574818	-1.05798	0.503364	-0.417759	0.610425	-1.6229	0.911395	1.42773	3.45322	4.63894	3.78591
		0.20992	1.39375	-1.13529	0.954907	0.6911	0.536878	-0.419231	-1.00604	0.370233	-0.072253	0.150777	1.37182	3.63381	3.7595	4.82975	4.20343
		-1.49503	-1.42093	-2.19612	0.366007	0.407882	0.901794	-1.90228	0.903932	0.951165	0.108944	-0.880224	0.659691	1.22592	2.00583	4.82975	4.20343
	CAD96CA-M4-CopGFP-His+JH III	0.623681	2.65413	8.42675	0.863953	0.603326	-1.61005	-2.07288	-2.71314	-2.11213	-1.69876	-2.28567	-2.13082	-1.38533	8.88478	-1.3619	1.46845
		-0.815306	1.52023	0.448616	-0.0490679	-0.685006	1.02137	0.373299	0.823224	-1.0523	-2.7591	-0.63986	0.795202	-0.966549	0.349835	-3.72157	-4.0572
		-0.362123	-0.794491	-0.113412	-0.307263	0.241736	-0.185038	-0.0156689	-1.09098	-0.884114	0.493588	1.15841	1.31206	0.902078	-2.012	-0.419776	-2.68634

## Sheet: Figure 3I
Figure 3I	Ligand concentration (M)	3.0518e-11	6.1035e-11	1.2207e-10	2.44141e-10	4.88281e-10	9.76562e-10	1.95312e-09	3.90625e-09	7.8125e-09	1.5625e-08	3.125e-08	6.25e-08	1.25e-07	2.5e-07	5e-07	1e-06
	FGFR1-CopGFP-His+JH III	2.12968	2.03135	2.01365	1.44883	1.80733	-1.94757	0.406704	-0.668852	0.00260441	2.27566	3.8381	10.6284	20.9939	26.0774	25.7691	25.7413
		1.47902	1.13656	0.958898	1.51202	0.120781	0.68712	0.877302	1.83789	2.69988	5.30066	10.201	24.4345	32.9314	32.706	33.6147	32.8905
		-0.382201	-0.15418	1.96869	-0.0996641	0.37522	1.16497	0.735032	1.5215	4.64955	5.38723	8.44391	21.0135	27.809	28.3615	28.1877	27.9943
	FGFR1-M1-CopGFP-His+JH III	0.631835	1.27791	-0.446717	0.459146	0.650211	-0.379088	2.54671	2.20513	2.4828	5.1712	10.148	21.2445	28.0517	29.3467	28.7436	28.8888
		-0.899519	-1.80245	-0.314451	-0.181461	-0.604051	-0.201384	0.62476	2.46603	7.40748	7.46658	18.429	18.9689	25.0787	25.7275	24.5032	25.216
		1.1262	-0.431774	1.23674	0.987334	-0.201595	1.73484	-0.029532	1.19936	3.44546	4.58527	8.88141	19.257	26.6514	25.966	27.0219	25.1407
	FGFR1-M2-CopGFP-His+JH III	1.61807	1.85098	-2.39148	-1.42923	-2.47267	0.557041	0.404279	2.35342	1.93247	-0.223795	2.32672	4.62276	8.09546	7.63158	17.9528	15.9221
		-0.437014	-0.910194	-2.74431	0.412365	1.58528	-0.507368	1.54653	0.328837	0.183329	8.65539	5.69441	8.52548	11.7778	10.1578	9.9333	11.1634
		-0.0505976	5.3976	-0.0448387	0.0330306	0.00565185	0.0709999	0.448856	-1.69621	-0.638133	-0.622465	0.747127	5.19624	8.23713	9.71211	7.91381	11.1323
	FGFR1-M3-CopGFP-His+JH III	0.545103	1.2863	-0.272816	-1.08331	0.563212	0.632437	5.32051	-1.56766	-0.215001	0.868598	0.188491	-1.73745	-1.68358	4.65597	22.5693	0.12104
		0.228991	0.299454	-0.512818	-0.0996463	0.207606	-0.212857	-0.865521	0.242114	0.742968	1.56204	0.138276	2.33036	-0.0193671	1.07781	3.37186	0.58579
		-1.25455	0.663197	0.937823	0.644702	2.08764	1.71769	0.224148	-0.432316	-0.368913	-1.23511	0.0914168	0.120113	0.42861	-2.38375	0.0461177	4.16184
	FGFR1-M4-CopGFP-His+JH III	2.20903	-1.06681	-1.63872	4.39886	-0.237597	-0.193368	-1.14413	-0.860054	0.210356	-0.796596	0.487952	1.96588	1.79152	5.45278	2.73338	0.219158
		-0.562986	0.675818	-0.435254	-0.608207	1.80437	-1.14914	1.19924	-1.48842	0.180649	1.34316	-0.840357	0.274578	1.00913	0.397027	0.698068	-0.261271
		-0.0442052	-1.78627	-0.254103	1.02329	1.96977	-0.957201	-1.02092	0.368647	0.343131	2.01132	1.66784	1.05879	1.93103	4.43491	2.22576	1.99806
