# Supplementary material for: Receptor tyrosine kinases CAD96CA and FGFR1 function as the cell membrane receptors of insect juvenile hormone
Source: eLife. 2025 Mar 14;13:RP97189. doi: 10.7554/eLife.97189 (PMC11908783; doi:10.7554/eLife.97189)
Supplement: Figure 4—figure supplement 2—source data 1. [file elife-97189-fig4-figsupp2-data1.xlsx]

## Sheet: Figure 4–figure supplement 2E
Figure 4–figure supplement 2E		WT			Cad96ca mutant			Fgfr1 mutant
		DMSO	JH III	JH III+CaCl2	DMSO	JH III	JH III+CaCl2	DMSO	JH III	JH III+CaCl2
		3.709	11.827	13.949	3.74	5.356	6.307	3.901	7.611	4.739
		5.507	9.532	11.139	5.341	6.229	4.674	5.557	7.592	5.607
		5.524	10.53	14.694	5.361	4.836	5.374	6.434	5.668	5.653
