# Supplementary material for: Receptor tyrosine kinases CAD96CA and FGFR1 function as the cell membrane receptors of insect juvenile hormone
Source: eLife. 2025 Mar 14;13:RP97189. doi: 10.7554/eLife.97189 (PMC11908783; doi:10.7554/eLife.97189)
Supplement: Figure 4—source data 1. [file elife-97189-fig4-data1.xlsx]

## Sheet: Figure 4E
Figure 4E		Pupation on time			Early pupation			Dead
	WT	90.4762	95.6522	88.4615	0	0	0	9.52381	4.34783	11.5385
	Ca96ca mutant	0	0	0	87.5	83.3333	90	12.5	16.6667	10
	Fgfr1 mutant	0	0	0	90	91.6667	92.3077	10	8.33333	7.69231

## Sheet: Figure 4F
Figure 4F		WT									Ca96ca mutant
	Kr-h1	0.742262	1.11729	1.20581	0.795536	1.19748	1.04972	1.02574	0.950439	1.02574	0.166086	0.110338	0.089003	0.449585	0.443396	0.394109	0.52003	0.434271	0.345478
	Hr3	1.03049	0.909618	1.06683	0.997692	0.905425	1.10701	1.31646	0.92445	0.82169	11.1838	9.80375	8.35902	9.40438	10.5805	8.4757	8.85607	11.1322	12.4379
	Ecr	1.44393	0.846745	0.817902	0.848704	1.22547	0.961483	0.909618	1.06683	1.03049	9.51366	11.0043	9.91766	12.8171	9.71356	13.6422	17.5492	16.4879	18.2944
	Foxo	0.817902	1.21419	1.00696	0.712025	1.30134	1.07923	0.946058	0.907519	1.16473	9.18959	10.9283	9.98664	7.6564	5.01645	8.14925	5.61778	6.36429	6.19026
	Atg8	1	0.895025	1.11729	1	0.895025	1.11729	0.933033	0.959264	1.11729	5.89708	4.59479	4.14106	5.3765	4.33691	4.74585	4.59479	4.72397	5.24157

## Sheet: Figure 4G
Figure 4G		WT									Fgfr1 mutant
	Kr-h1	0.814131	1.06683	1.15135	0.795536	1.19748	1.04972	1.02574	0.950439	1.02574	0.317905	0.189027	0.252905	0.401461	0.31498	0.113702	0.20829	0.183858	0.192999
	Hr3	1.03049	0.909618	1.06683	0.997692	0.905425	1.10701	1.31646	0.92445	0.82169	16.4119	17.4683	20.2054	19.1597	16	17.7531	13.0562	14.0907	13.4233
	Ecr	1.44393	0.846745	0.817902	1.14605	0.672062	1.29834	0.909618	1.06683	1.03049	15.8895	12.8171	12.7286	10.7779	11.0809	8.51496	7.14368	8.73415	8.09296
	Foxo	0.817902	1.21419	1.00696	1.13027	1.03288	0.856584	1.01866	0.905425	1.08423	12.1257	15.1369	15.455	14.2215	9.78112	10.1965	8.87656	7.83536	7.1602
	Atg8	1.38191	0.761368	0.950439	1.38191	0.761368	0.950439	1	0.895025	1.11729	3.26406	4.07462	3.80176	5.06303	4.22807	3.75809	4.0935	2.91467	2.59069

## Sheet: Figure 4I
Figure 4I		Kr-h1
	WT+JH III	1.24257	0.866537	0.928731	1.16743	0.954842	0.897095	1.16205	1.00463	0.856584
	Cad96ca mutant+JH III	0.364334	0.347078	0.276114	0.347881	0.313528	0.276752	0.233258	0.271684	0.327598
	Fgfr1 mutant+JH III	0.183858	0.251158	0.23761	0.183858	0.269184	0.212667	0.23871	0.366868	0.335256
