# Supplementary material for: Receptor tyrosine kinases CAD96CA and FGFR1 function as the cell membrane receptors of insect juvenile hormone
Source: eLife. 2025 Mar 14;13:RP97189. doi: 10.7554/eLife.97189 (PMC11908783; doi:10.7554/eLife.97189)
Supplement: Figure 5—source data 1. [file elife-97189-fig5-data1.xlsx]

## Sheet: Figure 5D
Figure 5D		Pupation on time			Early pupation			Dead
	WT	86.6667	88.0952	83.3333	0	0	0	13.3333	11.9048	16.6667
	Met1 mutant	0	0	0	45	40.7407	40	55	59.2593	60
	Ca96ca Fgfr1 mutant	0	0	0	72.2222	68.1818	70	27.7778	31.8182	30
	Met1 Ca96ca Fgfr1 mutant	0	0	0	20	15.3846	22.2222	80	84.6154	77.7778
		Normal adult			Abnormal adult			Dead
	WT	92.3077	91.8919	90	0	0	0	7.69231	8.10811	10
	Met1 mutant	0	0	0	11.1111	18.1818	20	88.8889	81.8182	80
	Ca96ca Fgfr1 mutant	0	0	0	23.0769	33.3333	28.5714	76.9231	66.6667	71.4286
	Met1 Ca96ca Fgfr1 mutant	0	0	0	0	0	25	100	100	75

## Sheet: Figure 5E
Figure 5E		WT									Met1 mutant
	Kr-h1	1.02101	0.907519	1.07923	1.217	1.03049	0.797377	0.959264	0.965936	1.07923	0.122145	0.181327	0.195693	0.131518	0.107569	0.108317	0.012809	0.019016	0.020522
	Hr3	1.1434	1.07425	0.814131	1.16743	0.961483	0.890899	1.1434	1.07425	0.814131	15.1369	18.8959	16.7955	18.4217	15.4907	17.188	13.6107	18.2101	16.1859
	Ecr	1.1355	1.02337	0.860551	1.02101	1.19748	0.817902	1.1355	1.02337	0.860551	12.9063	10.0561	12.6407	12.2101	10.3388	10.7779	13.3306	14.689	11.3661
	Br-z7	1.20303	0.905425	0.918064	1.12766	0.961483	0.922316	1.20303	0.905425	0.918064	11.5782	14.8597	14.3535	9.21084	8.4757	8.18699	14.723	13.3614	12.9063
	Atg8	1.20025	0.988514	0.842842	0.82932	1.02811	1.17284	1.20025	0.988514	0.842842	9.38268	9.78112	8.87656	13.4543	10.3388	11.6318	10.3867	8.7949	7.98154
		Ca96ca Fgfr1 mutant									Met1 Ca96ca Fgfr1 mutant
	Kr-h1	0.169968	0.122711	0.107569	0.152477	0.173941	0.155681	0.018667	0.013477	0.011814	0.079293	0.061355	0.053784	0.114758	0.132739	0.118805	0.005423	0.004196	0.003679
	Hr3	7.19336	11.8488	9.10505	11.2876	10.4589	9.42614	6.77396	11.1579	8.57419	21.8062	23.8624	24.7039	24.8757	26.6611	28.9736	25.5751	21.2099	23.5339
	Ecr	7.48153	6.16172	6.55835	5.03968	5.00487	6.6499	8.87656	7.31065	7.78124	17.5898	14.5876	18.5927	20.7255	20.0195	23.1563	20.6299	24.1955	21.8062
	Br-z7	7.3615	6.86852	6.23332	4.64818	3.67226	3.37916	6.9323	6.46806	5.86989	22.7848	20.6776	20.6776	17.3476	15.8528	14.1887	20.2521	24.2515	24.2515
	Atg8	5.84283	4.68051	4.01853	6.20458	5.74909	5.03968	5.50217	4.40762	3.78423	14.5876	12.6992	16.2985	17.188	18.9396	19.6075	18.3368	21.0634	15.5266
