# Supplementary material for: Receptor tyrosine kinases CAD96CA and FGFR1 function as the cell membrane receptors of insect juvenile hormone
Source: eLife. 2025 Mar 14;13:RP97189. doi: 10.7554/eLife.97189 (PMC11908783; doi:10.7554/eLife.97189)
Supplement: Figure 6—figure supplement 1—source data 1. [file elife-97189-fig6-figsupp1-data1.xlsx]

## Sheet: Figure 6–figure supplement 1A
Figure 6–figure supplement 1A	Kr-h1
	DMSO	JH III	dsGfp+JH III	dsCad96ca+JH III	dsFgfr+JH III
	1.02101	13.5479	11.1838	5.55325	5.19335
	1.07923	12.996	13.6737	4.41782	4.9818
	0.907519	11.7942	11.9037	4.86801	4.68051
	0.880666	12.0698	11.4452	3.5801	4.8121
	1.02574	14.0581	10.2437	4.72397	5.5661
	1.10701	11.1065	13.8967	3.81055	5.26585
	1.03288	12.3519	10.2201	4.28709	3.65533
	0.850667	12.6992	11.2615	3.22657	4.25748
	1.13813	10.315	8.95897	3.11666	4.62675

## Sheet: Figure 6–figure supplement 1B
Figure 6–figure supplement 1B	Kr-h1
	DMSO	JH III	dsGfp+JH III	dsCad96ca+JH III	dsHtl+JH III	dsBtl+JH III
	1.02101	9.66878	9.04215	4.00925	3.74942	4.91321
	1.07923	13.1167	11.0553	3.66378	4.84557	3.45017
	0.907519	11.4187	10.3867	3.16748	4.52108	3.99077
	1.08674	9.55772	8.53466	3.95406	4.33691	4.20858
	0.90125	12.7875	10.7282	2.99661	3.80176	3.25652
	1.02101	9.16838	9.87194	4.35699	4.55252	3.95406
	0.816014	8.75435	10.126	3.95406	3.89062	4.20858
	1.17013	12.1257	10.2674	4.26733	4.56306	5.18137
	1.04729	13.0864	11.7942	3.32495	3.38698	3.51453

## Sheet: Figure 6–figure supplement 1C
Figure 6–figure supplement 1C
	Cad96ca	dsGfp	dsCad96ca		Fgfr	dsGfp	dsFgfr
		1.08925	0.362654			1.09936	0.083235
		0.948246	0.577009			1.01162	0.103905
		0.968171	0.39685			0.899171	0.112137
		1.08674	0.368567			0.933033	0.248273
		1.06437	0.334482			0.97942	0.181747
		0.864537	0.435275			1.09429	0.203063
		1.03766	0.578344			1.00463	0.135528
		0.866537	0.574349			0.838956	0.12385
		1.11214	0.602904			1.18646	0.091929

## Sheet: Figure 6–figure supplement  1D
Figure 6–figure supplement 1D
	Cad96ca	dsGfp	dsCad96ca		Htl	dsGfp	dsHtl		Btl	dsGfp	dsBtl
		1.16743	0.4954			0.878633	0.125579			1.17284	0.316439
		0.948246	0.581023			1.26868	0.136471			0.835088	0.167241
		0.903335	0.39685			0.897095	0.103426			1.02101	0.200267
		1.1355	0.404254			0.997692	0.14492			1.1434	0.267943
		1.15936	0.522439			0.810378	0.136156			0.897095	0.243164
		0.759611	0.393199			1.23685	0.125289			0.974905	0.257028
		1.02101	0.50581			0.997692	0.152125			1.03288	0.46544
		0.913831	0.52003			0.937354	0.219658			0.89296	0.182588
		1.07177	0.440333			1.0693	0.252321			1.08423	0.20829
