# Supplementary material for: Receptor tyrosine kinases CAD96CA and FGFR1 function as the cell membrane receptors of insect juvenile hormone
Source: eLife. 2025 Mar 14;13:RP97189. doi: 10.7554/eLife.97189 (PMC11908783; doi:10.7554/eLife.97189)
Supplement: Figure 6—source data 1. [file elife-97189-fig6-data1.xlsx]

## Sheet: Figure 6A
Figure 6A		DMSO			JH III			dsGFP+JH III			dsCad96ca+JH III			dsFgfr1+JH III
	0	1	1	1	1	1	1	1	1	1	1	1	1	1	1	1
	10	0.994987	0.984875	1.00343	0.983786	1.015	0.999225	1.00351	0.991686	0.999716	1.00428	0.990319	1.00108	0.957849	0.995156	1.00228
	20	1.00206	1.00979	1.00724	1.01717	1.03082	1.00465	1.04716	1.00785	1.00057	1.00981	1.00211	1.00361	1.02544	1.00138	0.996199
	30	1.01534	0.989324	1.00038	1.0329	1.00365	1.00077	1.04092	0.983372	0.999432	1.00999	1.00123	0.999639	1.0189	0.980623	1
	40	0.997641	0.986358	0.999619	1.01764	1.00811	1.00698	1.04521	0.995843	0.999716	1.00535	1.00158	1.00036	0.981831	0.988235	1.0095
	50	0.992333	1.00445	1.00229	1.01097	0.981752	1.00543	1.03624	0.991224	1	0.98876	0.994191	1.00181	0.984012	0.997924	1.0019
	60	0.982011	1.0003	1.00762	1.02098	1.01906	1.0031	1.04949	0.996767	1.00028	1.01481	0.991375	0.977617	0.992006	1.03183	0.987837
	70	1.01799	1.00208	1.00648	1.0453	1.04339	1.02015	1.06469	1.03834	1.0372	1.00589	1.0088	1.01119	1.0109	1.03529	1.02014
	80	0.978767	0.994958	1.00953	1.06915	1.08719	1.08062	1.10288	1.08868	1.13093	1.05192	1.05017	1.0343	1.0407	1.08443	1.04105
	90	0.976703	0.987841	1.00305	1.12875	1.16058	1.13527	1.2007	1.12286	1.23033	1.07351	1.06108	1.06679	1.05741	1.10519	1.10224
	100	0.98437	1.00148	1.00229	1.23033	1.21857	1.18798	1.27747	1.20139	1.30247	1.11882	1.12234	1.09711	1.08648	1.11349	1.14823
	110	0.985255	1.00474	1.00076	1.32141	1.32279	1.31473	1.33476	1.37506	1.33826	1.14683	1.15033	1.12852	1.13227	1.15986	1.19612
	120	0.983191	0.983096	1.00038	1.42537	1.40835	1.40388	1.40374	1.42125	1.40358	1.24353	1.20472	1.17509	1.22093	1.22837	1.24896
	130	0.981716	1.00356	0.999238	1.4206	1.3086	1.32132	1.43141	1.3649	1.34252	1.16824	1.16353	1.16679	1.18314	1.21176	1.21171
	140	0.988794	0.991993	1.00114	1.30615	1.24818	1.22674	1.32424	1.26559	1.28003	1.11276	1.12621	1.12022	1.15916	1.15433	1.16344
	150	0.978178	1.00385	1.00267	1.20029	1.1914	1.13992	1.1933	1.24249	1.27464	1.06833	1.09558	1.07401	1.12936	1.11211	1.11022
	160	0.997051	1.00119	0.998476	1.10587	1.08313	1.05116	1.07404	1.17321	1.23204	1.0339	1.0433	1.02635	1.08067	1.08443	1.09502
	170	1.00324	0.997034	1.00381	1.06438	1.02433	1.04186	1.03663	1.08915	1.13263	1.01659	1.01267	1.00903	1.0436	1.04152	1.05093
	180	0.980537	0.997924	1.00191	1.01526	1.01095	1.02248	0.993765	1.0097	1.03323	1.00571	0.990495	0.994585	1.03198	1.00277	1.00912
	190	0.998526	1.00771	1.00343	1.10873	1.04055	1.03566	1.03157	1.03464	1.01449	1.04871	1.01971	1.01913	1.05741	1.07405	1.01976
	200	0.977883	0.992289	0.999619	1.17644	1.08719	1.04845	1.07677	1.07714	1.07981	1.07172	1.05668	1.06679	1.09012	1.10865	1.04675
	210	0.981421	0.997331	1.00419	1.20887	1.10341	1.13488	1.13016	1.17182	1.14882	1.10152	1.09188	1.11444	1.13735	1.14671	1.08856
	220	1.00236	0.9914	1.00343	1.27659	1.24574	1.22791	1.22798	1.24619	1.215	1.12614	1.13008	1.12419	1.16933	1.15709	1.13759
	230	0.991448	0.9914	1.0061	1.37244	1.30738	1.32093	1.34295	1.29838	1.27805	1.18466	1.16353	1.17184	1.19404	1.1827	1.19232
	240	1.00059	0.994069	0.969512	1.38627	1.38848	1.41008	1.42206	1.40462	1.35189	1.24532	1.20401	1.20505	1.22311	1.21246	1.23983
	250	0.959304	0.992289	0.967988	1.41965	1.40186	1.40775	1.40998	1.4097	1.39108	1.23872	1.20436	1.213	1.22456	1.21246	1.23907
	260	1.02418	0.998814	1.00267	1.42108	1.39173	1.36899	1.41543	1.41201	1.38881	1.23461	1.20401	1.22022	1.22456	1.21176	1.22007
	270	0.993807	0.989324	0.992759	1.42203	1.39862	1.39031	1.42011	1.40831	1.40244	1.2339	1.20489	1.20217	1.22311	1.21107	1.21627
	280	0.980537	0.992289	0.991997	1.41869	1.40835	1.40581	1.42712	1.41108	1.39733	1.24567	1.20577	1.18773	1.22529	1.21107	1.20182
	290	0.982601	0.991103	1.00038	1.42298	1.40552	1.38643	1.40959	1.41108	1.40102	1.24532	1.2056	1.20614	1.22093	1.21107	1.16382
	300	0.976703	0.997331	1.01143	1.42108	1.40835	1.3876	1.41738	1.40554	1.39165	1.23729	1.20472	1.20614	1.22093	1.21315	1.24021
	310	1.00236	1	0.996189	1.41965	1.40227	1.39535	1.41933	1.40554	1.40131	1.24532	1.20472	1.19856	1.22166	1.21453	1.17826
	320	0.991448	1.00119	0.964177	1.42346	1.40105	1.40814	1.41816	1.40416	1.40244	1.23872	1.20472	1.21661	1.22166	1.21522	1.27328
	330	0.997641	1.00474	1	1.42442	1.39862	1.40698	1.41894	1.40878	1.40273	1.23461	1.20542	1.16931	1.22384	1.21176	1.28468
	340	0.98555	1.00415	0.994665	1.4206	1.40835	1.37791	1.41933	1.4097	1.38824	1.2339	1.20542	1.20578	1.22311	1.21176	1.23983
	350	1.02418	1.00415	1.00267	1.42298	1.40552	1.38837	1.42751	1.41016	1.40244	1.24567	1.20507	1.18628	1.22384	1.21246	1.24021
	360	0.993807	1	0.99657	1.42489	1.40714	1.35853	1.41543	1.41108	1.38512	1.24567	1.20507	1.2065	1.22238	1.21246	1.23147
	370	0.980537	0.997331	1.00229	1.4206	1.40714	1.39612	1.4166	1.4097	1.40244	1.23693	1.20454	1.21986	1.22238	1.21315	1.26188
	380	0.982601	0.999703	1.00114	1.42155	1.39173	1.4093	1.42167	1.41108	1.38881	1.24585	1.20525	1.20505	1.22311	1.21315	1.22387
	390	0.987024	1	1.00267	1.42203	1.39862	1.39108	1.41387	1.41155	1.40102	1.24032	1.20507	1.20939	1.22311	1.21384	1.23983
	400	0.998231	0.998814	0.969131	1.42346	1.40835	1.40814	1.41543	1.40878	1.38597	1.2405	1.20525	1.20578	1.22311	1.21384	1.24667
	410	1.00029	0.998221	0.971799	1.42298	1.40673	1.36938	1.41972	1.40878	1.40329	1.23747	1.20454	1.19856	1.22311	1.21107	1.24477
	420	1.00029	1.00119	0.992378	1.42298		1.40891	1.42634	1.4097	1.37461	1.24532	1.20436	1.21588	1.22456	1.21107	1.22007

## Sheet: Figure 6B
Figure 6B		DMSO			JH III			dsGFP+JH III			dsCad96ca+JH III			dsHtl+JH III			dsBtl+JH III
	0	1	1	1	1	1	1	1	1	1	1	1	1	1	1	1	1	1	1
	10	0.997249	0.99754	0.9968	0.981405	1.00667	0.993127	0.985542	0.989011	0.998081	0.991003	1.01687	1.0039	1.01126	0.997783	1.00951	1.02135	0.990385	0.984181
	20	1	1.00246	1	1.0124	1.00889	1.01718	1.03133	1.08352	1.00384	1.00386	0.988751	1.01299	0.977486	1.01552	0.984152	1.02728	0.990385	0.99661
	30	1.01238	1.00984	1.0144	1.07025	1.01111	1.03436	0.975904	1.02857	0.996161	1.01414	0.988751	0.998701	0.994371	1.02661	1	1.00474	0.987637	1
	40	0.984869	1.00492	0.9824	1.02893	1.02667	1.02749	0.971084	1.03297	0.998081	1.02956	1.00113	1.0013	1.0469	0.986696	1.03962	1.01898	1.00412	1.01808
	50	1.00413	1.03198	1.008	1.06198	1.00222	1.02062	1	0.96044	1	1.02828	0.986502	1.00649	1.00938	1.01552	1.00792	1.03915	1.03022	1.01695
	60	1.02338	1.01968	1.0304	1.00826	0.997778	1.01031	1.04096	0.945055	1.00192	1.01285	1.01012	1.01039	0.932458	1.00443	0.949287	1.06406	1.05357	1.00339
	70	1.01926	1.00861	1.0256	1.1405	1.11556	1.08591	1.06506	1.03297	1.0595	1.03213	1.03262	1.04026	0.979362	1.05765	0.988906	1.04745	1.06593	1.02034
	80	1.01651	1.00246	1.0384	1.17355	1.17333	1.18213	1.16145	1.0967	1.11708	1.06041	1.04949	1.08442	1.00751	1.09534	1.01268	1.01161	1.09431	1.062
	90	1.00688	1	1.0112	1.21074	1.24222	1.25258	1.28193	1.15824	1.21305	1.11183	1.09561	1.11039	1.10319	1.14191	1.10935	1.0949	1.09203	1.0904
	100	1.01788	1.01968	1.008	1.28719	1.30667	1.31443	1.34217	1.24396	1.3167	1.1401	1.12036	1.15454	1.16135	1.1796	1.14263	1.13523	1.15522	1.11525
	110	0.998624	0.99139	1.0016	1.36364	1.38889	1.36082	1.41687	1.31429	1.3666	1.1838	1.16198	1.2026	1.21013	1.22395	1.18383	1.17556	1.22665	1.15367
	120	0.997249	0.99754	1	1.43388	1.42	1.41065	1.45783	1.41099	1.42418	1.23136	1.20247	1.24026	1.2833	1.26386	1.24564	1.21234	1.27198	1.21808
	130	0.979367	1.0123	0.9952	1.42355	1.42667	1.39003	1.39036	1.36044	1.39539	1.2108	1.13048	1.21039	1.28705	1.26164	1.24881	1.22776	1.27747	1.20339
	140	1	1.01599	1.0032	1.37397	1.36222	1.31443	1.28675	1.28132	1.35701	1.16452	1.10236	1.17273	1.2364	1.20399	1.20602	1.20403	1.2445	1.13672
	150	1.0055	1.02091	1.0096	1.32025	1.30444	1.2732	1.23374	1.22857	1.32054	1.13239	1.07424	1.13636	1.1651	1.14856	1.14263	1.17438	1.16209	1.10848
	160	0.990371	1.03813	0.992	1.26446	1.22889	1.22337	1.21446	1.12747	1.22457	1.0964	1.04724	1.09481	1.09006	1.08869	1.07924	1.1032	1.1195	1.07684
	170	1.00963	0.99016	1.0144	1.10124	1.13778	1.18213	1.11325	1.1033	1.1286	1.0437	1.02362	1.06753	1.05628	1.00222	1.05388	1.04982	1.08516	1.03051
	180	1.00275	1.03075	1.0064	1.08884	1.08667	1.09622	1.07952	1.04176	1.03263	1.02185	1.02137	1.03247	1.04128	1.07982	1.03804	0.995255	1.02747	1.0113
	190	1.00413	1.01599	1.008	1.09917	1.03556	1.15464	1.18554	1.08571	1.09789	1.05527	1.0315	1.06883	1.01876	1.09978	1.01902	1.03796	1.04396	1.04068
	200	1	1.01476	1.0032	1.07645	1.08667	1.21134	1.25542	1.14286	1.15547	1.09255	1.03262	1.11039	1.0394	1.12195	1.03645	1.08304	1.0783	1.07345
	210	0.991747	1.01353	1.0096	1.14463	1.19111	1.25086	1.31325	1.21978	1.238	1.13882	1.04612	1.15195	1.05441	1.14634	1.0523	1.12693	1.09615	1.11412
	220	0.994498	1.02214	0.9968	1.14876	1.28	1.31959	1.39277	1.27912	1.30134	1.17995	1.07987	1.18701	1.11257	1.1796	1.09826	1.16845	1.13324	1.15028
	230	1.00413	1.02214	1.008	1.24587	1.31778	1.37973	1.44096	1.33626	1.34357	1.21851	1.13498	1.22857	1.19887	1.2439	1.16799	1.20403	1.21566	1.18418
	240	1.02338	1.03198	1.0304	1.42149	1.4	1.43986	1.47229	1.4044	1.42034	1.2018	1.19573	1.21818	1.26829	1.25942	1.22662	1.24674	1.25	1.21469
	250	1.01788	1.02829	1.024	1.45041	1.42667	1.42955	1.44096	1.3978	1.41651	1.21979	1.20472	1.22338	1.24203	1.25721	1.20761	1.23606	1.25687	1.20791
	260	1.0055	0.99754	1.0096	1.44215	1.39556	1.42612	1.41205	1.38901	1.40883	1.19794	1.19685	1.21948	1.21388	1.24168	1.21236	1.24555	1.25	1.2113
	270	1.011	1.00246	1.016	1.40289	1.41778	1.43471	1.45542	1.41099	1.41651	1.20566	1.17548	1.21818	1.20075	1.25277	1.22029	1.23369	1.25275	1.20678
	280	1.00825	1.00123	1.0128	1.45041	1.42667	1.43643	1.42651	1.41758	1.41843	1.21851	1.20697	1.22467	1.22702	1.25499	1.20761	1.23132	1.24313	1.18418
	290	0.980743	1.00738	1.0288	1.39876	1.41333	1.43643	1.43855	1.4044	1.40691	1.25064	1.2351	1.23766	1.25891	1.2439	1.22187	1.24792	1.25412	1.21243
	300	1.011	0.99754	1	1.36777	1.38667	1.42955	1.45783	1.40879	1.41651	1.19923	1.2036	1.21688	1.21388	1.25942	1.22821	1.25148	1.24863	1.18983
	310	1.00825	1.01353	0.9968	1.41735	1.42667	1.42612	1.47229	1.3978	1.40883	1.21851	1.20472	1.22208	1.20638	1.25721	1.20919	1.22183	1.23901	1.18418
	320	1.00413	1.02214	1.008	1.45248	1.39556	1.43471	1.41928	1.38901	1.41651	1.19794	1.19685	1.22338	1.21764	1.24168	1.21553	1.21945	1.25	1.21243
	330	1.02338	1.02214	1.0304	1.42149	1.41778	1.43643	1.42892	1.41319	1.41843	1.2018	1.17548	1.21948	1.26829	1.25277	1.22662	1.23843	1.23764	1.19209
	340	1.01788	1.03198	1.024	1.40909	1.42667	1.43643	1.39518	1.41758	1.40691	1.21979	1.20697	1.22338	1.24203	1.25499	1.20761	1.1981	1.24725	1.18531
	350	1.0055	1.02829	1.0096	1.44215	1.41333	1.42955	1.42892	1.4044	1.41651	1.19794	1.2351	1.21948	1.21388	1.2439	1.2187	1.20996	1.24313	1.2
	360	0.997249	1.00615	1.016	1.42975	1.39556	1.42783	1.45542	1.40659	1.41267	1.20566	1.20697	1.21429	1.18199	1.25277	1.22029	1.18861	1.24039	1.20678
	370	1.00825	1.00246	1.0128	1.45041	1.42667	1.43471	1.44819	1.3978	1.41651	1.21851	1.19348	1.21818	1.22514	1.24834	1.22187	1.21352	1.25275	1.18418
	380	0.980743	1.00123	0.9968	1.40289	1.39778	1.43643	1.41928	1.4	1.41843	1.19923	1.1991	1.21429	1.22327	1.24834	1.19176	1.21471	1.25	1.20113
	390	1.011	1.00738	1.016	1.42149	1.41556	1.42955	1.45542	1.41099	1.40691	1.21208	1.18673	1.22208	1.2364	1.2439	1.20285	1.19336	1.24725	1.2
	400	1.02201	1.00615	1.0128	1.44215	1.42444	1.42955	1.47229	1.41538	1.41651	1.21851	1.20922	1.22597	1.24015	1.2439	1.21395	1.18268	1.23901	1.19322
	410	1.00413	1.01968	1.024	1.41942	1.42	1.43127	1.43855	1.4044	1.42226	1.19794	1.22722	1.22078	1.22889	1.24834	1.20919	1.19217	1.26236	1.20452
	420	1.02338	1.02214	1.0304	1.42149	1.41111	1.43127	1.47229	1.41758	1.42034	1.2018	1.20585	1.21818	1.26829	1.25277	1.22662	1.20641	1.24588	1.19322

## Sheet: Figure 6C
Figure 6C		DMSO			JH III
	0	1	1	1	1	1	1
	10	1.04884	1.06667	1.05973	0.992593	0.998452	0.998141
	20	1.06744	1.00317	1.02697	1.02716	1.05418	1.00929
	30	1.07209	1.03016	1.04817	1.05185	0.990712	1.04647
	40	1.01163	1.05079	1.08092	1.04938	1.05573	1.0539
	50	1.05349	1.00952	1.03468	1.06667	1.06037	1.07249
	60	1.05116	1.06349	1.10019	0.980247	1.04799	1.04647
	70	1.07209	1.01587	1.04817	1.14815	1.02012	1.04089
	80	0.997674	0.969841	0.984586	1.16049	0.98452	0.988848
	90	1.06744	1.01746	1.04624	1.12099	1.00929	0.968401
	100	1.04186	0.979365	0.998073	1.0642	1.01084	1.00744
	110	1.06977	1.08095	1.06358	1.01482	1.02786	1.02045
	120	1.0907	1.06667	0.961464	0.990123	1.01548	1.05576
	130	1.05814	0.984127	1.03083	1.01728	1.04489	1.09108
	140	1.0814	1.08254	1.08671	1.05926	1.01238	1.01859
	150	1.07674	1.00952	1.02697	0.985185	1.01703	1.08178
	160	1.08372	1.01429	1.00771	1.00988	1.03406	1.06506
	170	1.05349	1.0746	1.0289	0.97037	1.08049	1.05019
	180	1.07209	1.01429	0.996146	1.06173	1.06656	1.02974
	190	0.955814	1.02381	1.02312	1.01482	1.00929	1.00186
	200	1.08837	0.98254	1.02505	1.03951	0.981424	1.01115
	210	1.07442	0.949206	1.07707	1.06667	1.00929	1.01859
	220	1.0907	0.98254	1.08285	1.05926	1.02322	1.04647
	230	1.04186	1.0254	1.05202	1.0321	0.979876	1.04461
	240	1.06744	0.98254	1.08092	0.985185	0.995356	1.02788
	250	1.07674	1.04444	1.0578	1.04938	0.989164	1.00744
	260	1.07209	0.998413	0.959538	1.00741	0.993808	1.04461
	270	1.02791	1.04127	0.980732	1.00247	1.0031	1.02602
	280	1.03023	1.03333	1.02505	1.07654	1.00929	1.01673
	290	1.03488	1.02063	1.04239	1.05432	1.00619	1.02602
	300	1.07442	1.08413	1.06936	1.03457	1.04644	1.04647
	310	1.0907	0.98254	1.08285	1.00988	0.979876	0.925651
	320	0.976744	1.0254	1.05202	1.0321	0.995356	0.946097
	330	1.06744	0.98254	1.08092	0.985185	0.989164	0.988848
	340	1.07674	1.04444	1.0578	1.04938	0.993808	1.00558
	350	0.981395	0.998413	0.959538	1.00741	1.0031	1.0316
	360	1.02791	0.993651	1.03854	0.982716	1.00929	1.02602
	370	1.03023	1.03333	1.02505	1.07654	1.00619	1.01673
	380	1.03488	1.02063	1.04239	1.05432	1.04644	1.02602
	390	1.07442	1.08413	1.07515	1.03457	0.979876	1.04647
	400	0.983721	1.03333	1.05202	0.982716	0.995356	0.925651
	410	0.951163	1.02063	1.08671	1.0321	0.989164	1.04461
	420	1.0186	0.988889	1.0578	1.03704	0.993808	1.01859

## Sheet: Figure 6D
Figure 6D		His+DMSO			CAD96CA-His+DMSO			FGFR1-His+DMSO			NRK-His+DMSO			His+JH III			CAD96CA-His+JH III			FGFR1-His+JH III			NRK-His+JH III
	0	1	1	1	1	1	1	1	1	1	1	1	1	1	1	1	1	1	1	1	1	1	1	1	1
	10	0.990654	0.996101	0.977273	0.973361	1.00545	0.995833	0.995134	0.990991	0.990654	0.989676	0.993663	1.00417	1.0098	0.977778	0.996241	0.998131	0.981439	1.00885	0.98835	0.988506	1.00189	1.01534	0.991453	0.995608
	20	1.02103	1.0039	1.01136	1.0041	1.00727	1.02708	1.03406	1.03243	0.981308	1.00442	0.987326	1	0.990196	1.01778	1.02444	1.01121	0.983759	0.99115	1.01942	0.995402	0.990566	0.998466	0.974359	1.00732
	30	1.01869	1.0156	0.954545	1.02049	1.00909	1.04375	0.992701	1.02342	0.964486	1.01622	0.987326	0.998611	1.03922	1.00444	0.986842	1.00935	0.981439	0.99292	0.990291	1.0069	0.973585	0.995399	0.982906	0.980966
	40	0.983645	1.0078	0.988636	1.02049	1.02182	1.0375	1.02433	1.02703	0.975701	1.03392	1.00127	1.00139	0.960784	0.955556	1.00564	0.971963	1.00232	1.00885	1.01165	0.988506	0.984906	0.998466	0.991453	0.951684
	50	1.00701	1.05068	1.01136	1.03279	1.00182	1.02917	1.02676	0.967568	0.95514	1.03245	1.01014	0.975	0.976471	1.01111	1.02444	1.00561	1	1.04602	1.01359	1.0046	0.964151	0.996933	1	0.966325
	60	1.00935	1.03119	0.990909	1	0.998182	1.01458	1.04623	0.954955	0.990654	1.01475	1.01141	0.969444	1.04706	0.988889	1.00564	0.990654	1.01856	1.00354	1.01165	0.988506	1	1.0092	1.02222	0.978038
	70	0.96028	1.01364	0.993182	0.967213	1.02182	0.96875	1.05839	1.02703	1.03738	1.03687	0.998733	0.955556	1.02353	0.966667	1.0094	1.00935	1.02552	1.0354	1.03883	1.01149	1.0283	1.01227	0.991453	0.973646
	80	0.978972	1.0039	1	1	0.96	0.995833	1.05109	1.04324	1.04673	1.02507	0.979721	1.02222	1.03922	0.955556	1.01692	1.06168	1.08585	1.07611	1.05243	1.05517	1.0566	1.01994	0.974359	0.979502
	90	0.985981	1	1.02273	0.995902	1.01636	0.977083	1.05109	0.967568	0.990654	0.980826	0.980989	1.04861	1.04706	0.973333	1.03571	1.09346	1.13457	1.09557	1.09126	1.07356	1.09434	1.01994	0.979487	0.980966
	100	0.985981	1.03119	0.977273	0.969262	1.06909	0.96875	1.0365	1.01982	0.964486	1.01327	1.00887	0.956944	1.04706	0.964444	1	1.14579	1.17865	1.14159	1.15728	1.14023	1.1434	1.03988	0.984615	0.991215
	110	0.995327	0.986355	0.990909	0.963115	0.954545	1.02708	1.04136	1.04144	0.958879	1.00442	0.967047	1.00833	1.04706	0.977778	1.00564	1.15888	1.1949	1.17345	1.2	1.1908	1.17547	1.0138	0.998291	0.980966
	120	0.992991	0.996101	0.965909	1.01229	0.98	1.04583	0.985401	0.976577	1.01495	0.970501	0.974651	1.04861	1.03922	0.988889	0.988722	1.24299	1.25058	1.21416	1.23495	1.24598	1.21321	1.0046	1.00513	0.951684
	130	0.985981	1.01949	1	1.00205	0.985455	0.997917	1.05839	0.971171	0.986916	0.946903	0.982256	1.04861	1.01961	0.995556	1.01692	1.25047	1.18793	1.18407	1.19417	1.1931	1.18491	0.984663	1.00342	0.979502
	140	0.997664	1.02534	1.02273	0.979508	0.969091	0.96875	1.05353	1.05045	0.968224	1.0413	0.988593	0.976389	1.02941	0.977778	1.03571	1.17383	1.16705	1.14159	1.17087	1.13333	1.14717	1.01687	0.991453	0.976574
	150	0.96028	1.03314	1.03409	1.00205	1.06727	1.00417	1.00243	1.00721	0.986916	1.00442	1.00761	0.958333	1.02549	0.955556	1.03759	1.15701	1.12993	1.10088	1.09126	1.10115	1.10943	0.983129	0.982906	0.978038
	160	0.981308	1.06043	0.977273	1.03074	1.00545	1.01042	0.982968	0.96036	1.00561	0.963127	1.00253	0.965278	1.04314	0.977778	1	1.03364	1.05104	1.0708	1.05631	1.06437	1.0717	0.986196	0.974359	0.978038
	170	1.01402	0.984405	0.954545	1.03074	0.967273	1.0125	1.05109	0.976577	1.0243	1.05015	0.988593	1.00278	1.01961	0.966667	0.986842	1.01495	1.0116	1.03717	1.03301	1.03908	1.03396	0.981595	0.991453	0.979502
	180	1	1.04873	1.04091	1.05943	1.07091	1	1.05839	1.03423	1.00187	1.02507	0.973384	0.969444	1.00196	0.973333	1.00752	1.00374	0.99768	0.99115	1	1.02069	1.01132	0.973926	0.957265	1.01025
	190	1.00467	1.02534	1.04546	1.04918	1.02909	0.983333	1.05109	1.07027	1.04673	1.01917	0.972117	1.00417	1.04314	0.973333	1.03759	1.01308	1.0116	1.03009	1.03301	1.04368	1.0283	0.967791	0.977778	0.995608
	200	0.997664	1.02339	0.970455	1.02664	1.07091	0.989583	0.997567	1.02703	1.02804	0.958702	1.01141	1.00694	1.03922	0.966667	1.01128	1.0486	1.04176	1.0708	1.08738	1.08046	1.0566	0.983129	0.974359	0.959004
	210	0.983645	1.02144	0.979545	1.03279	0.974545	0.995833	1.00973	1	1.01869	1.0118	0.963245	0.954167	1.00392	0.977778	1	1.11028	1.08121	1.1115	1.13592	1.11494	1.10377	0.990798	0.957265	0.995608
	220	0.988318	1.03509	0.981818	1.03689	1.04727	0.975	0.992701	1.04865	1.04299	1.01475	1.00127	1.00556	1.02549	0.955556	1	1.1514	1.15081	1.1469	1.1767	1.13103	1.14717	0.993865	1.01197	0.966325
	230	1.00467	1.03509	0.977273	1.03074	1.07818	1.04792	1.01703	1.04144	1.02804	0.955752	1.01267	1.03611	1.01961	0.955556	0.996241	1.20187	1.19026	1.17345	1.21942	1.1908	1.16981	0.993865	1.01709	0.963397
	240	0.96729	1.05068	1.00909	1.04098	0.963636	1.04167	0.975669	0.971171	1.00935	0.995575	1.00507	1.02639	1.0098	0.973333	1.0188	1.2486	1.2297	1.20354	1.24466	1.23908	1.20755	1.00767	1.01538	0.966325
	250	0.957944	1.04483	1	1.02869	0.985455	1.02708	0.987835	0.965766	1.00561	0.957227	0.977186	1.03194	1	0.973333	1.0188	1.23365	1.2529	1.20885	1.24272	1.21839	1.20377	1.02914	0.977778	0.995608
	260	1.00701	0.996101	0.979545	1.02049	0.96	1.0375	0.987835	0.958559	1	0.961652	1.03169	1.03333	1.04314	0.98	0.99812	1.21495	1.23202	1.21947	1.23301	1.22529	1.19811	1.03834	0.982906	0.992679
	270	1.01635	1.0039	0.988636	0.981557	0.978182	1.03125	0.982968	0.976577	1.00561	0.941003	1.02028	1.02639	1.04902	0.988889	1	1.25234	1.22506	1.23009	1.2233	1.24138	1.20377	1.03988	0.982906	0.966325
	280	1.01168	1.00195	0.984091	1.03484	0.985455	1.03333	1.02676	0.981982	0.968224	0.955752	0.979721	1.03472	1.0451	0.986667	1.00188	1.2243	1.21114	1.23186	1.20777	1.24368	1.18491	1.0092	0.984615	0.97511
	290	0.988318	1.0117	1.00682	0.981557	0.974545	0.995833	1.0365	0.971171	0.998131	0.992625	1.01141	1.04583	1.02157	0.975556	1.0188	1.23178	1.22042	1.2	1.21553	1.23678	1.19811	1.02914	0.984615	0.953148
	300	1.00935	0.996101	0.961364	0.987705	0.952727	0.995833	1.0292	0.974775	1.00187	1.00737	0.975919	1.02361	1.02157	0.966667	0.986842	1.21495	1.2181	1.19469	1.2233	1.22988	1.18868	1.04908	0.988034	0.956076
	310	1.00935	1.02144	0.965909	0.995902	0.985455	0.977083	1.02676	0.965766	1	0.955752	0.977186	1.03056	1.04314	1.01333	0.986842	1.2486	1.2529	1.1823	1.22718	1.21839	1.17925	0.993865	0.988034	0.954612
	320	1.00467	1.03509	0.977273	1.01025	0.96	0.979167	1.05839	0.958559	1.00561	1.0059	0.968314	1.03194	1.04118	1.01111	1.00188	1.24299	1.22506	1.18584	1.22718	1.21839	1.20377	1.04601	0.960684	0.956076
	330	1.01402	1.03509	1.02273	1	0.978182	0.970833	1.05353	0.978378	0.95514	1.01032	1.00761	1.025	1.04706	1.01111	1.03571	1.24299	1.22506	1.17876	1.22913	1.24368	1.16981	1.04295	0.965812	0.969253
	340	0.983645	1.05068	1.03636	0.989754	0.985455	0.975	1.01947	0.981982	0.958879	0.957227	0.979721	1.03194	1.02353	0.968889	0.988722	1.23738	1.23434	1.1823	1.22136	1.24138	1.19434	0.995399	0.969231	0.972182
	350	1.00701	1.04483	1.04091	1.02254	0.974545	1.04583	0.980535	0.971171	0.968224	0.961652	1.01141	1.025	1.03922	0.966667	0.992481	1.23738	1.2297	1.18938	1.22913	1.23678	1.20566	1	0.97094	0.98243
	360	0.992991	1.00975	0.984091	1.02869	0.96	1.0375	0.982968	0.972973	0.983178	0.941003	0.979721	1.02222	1.02941	0.968889	1.00188	1.23178	1.23202	1.2	1.21359	1.24138	1.20189	1.02454	0.977778	0.980966
	370	1.01168	1.0039	0.988636	1.03484	0.985455	1.0375	0.975669	0.965766	1.00561	0.955752	0.964512	1.02361	1.0451	0.966667	0.99812	1.23178	1.23434	1.2	1.22524	1.23678	1.20566	0.993865	0.976068	0.988287
	380	0.96729	1.00195	0.963636	0.979508	0.961818	1.01667	0.995134	0.967568	0.990654	0.992625	0.970849	1.02222	1.0098	0.993333	0.99812	1.21682	1.22738	1.1823	1.24078	1.23218	1.19434	1.03528	0.984615	0.989751
	390	1.00701	1.0117	0.988636	0.997951	0.976364	1.01667	0.982968	0.976577	1	0.948378	0.956907	1.03056	1.03922	1.00222	0.996241	1.21682	1.22274	1.17699	1.25049	1.24138	1.2	0.993865	0.982906	0.998536
	400	0.988318	1.00975	0.984091	1.02254	0.983636	1.01042	1	0.98018	1.00187	0.955752	0.982256	1.03472	1.02941	1.02	0.996241	1.21495	1.23202	1.19469	1.2233	1.25287	1.20377	1	0.982906	1.00293
	410	1.00467	1.03119	1	1.00205	0.98	1.01042	0.990268	0.971171	1.00935	1.0059	1.00253	1.02778	1.03922	1.02667	1.01504	1.21495	1.2413	1.19469	1.22718	1.23678	1.21132	1.04295	0.976068	0.995608
	420	0.990654	1.03509	1.01136	0.995902	0.972727	1.01875	1	0.981982	1.01682	0.995575	1.02915	1.00139	1.02941	1.02222	1.01692	1.21869	1.24362	1.20177	1.22913	1.24368	1.21321	1.03988	0.974359	1.00732

## Sheet: Figure 6E
Figure 6E		CAD96CA-His+JH III			CAD96CA-M1-His+JH III			CAD96CA-M2-His+JH III			CAD96CA-M3-His+JH III			CAD96CA-M4-His+JH III
	0	1	1	1	1	1	1	1	1	1	1	1	1	1	1	1
	10	0.998131	0.981439	0.994536	0.996296	1.00317	1.01438	1.01566	0.992126	1.00411	1.01627	1	1	1.00794	1	1.0046
	20	1.01121	0.983759	1.01093	1.01481	0.990491	1.01046	1.01761	0.99685	0.99863	0.996383	0.985401	1.00383	1.00317	0.983607	0.996933
	30	1.00935	0.981439	0.995902	1.00556	1.00317	1.01307	1.02153	1.00472	0.984932	0.992767	0.989781	1	0.984127	1.01639	0.996933
	40	0.971963	1.00232	1.00546	0.97963	1.00634	1.02092	1.0137	0.992126	0.99726	0.996383	0.99562	0.996169	0.996825	1.03443	1.0046
	50	1.00561	1	1.01366	0.990741	1	1.02092	1.01761	1.00315	0.984932	0.994575	1.00584	0.983397	0.992063	1.01639	0.989264
	60	0.990654	1.01856	1.0041	0.985185	1.01268	1.00261	1.0274	0.992126	1.00411	1.00904	1.00292	0.975734	1	1.02131	0.993865
	70	1.00935	1.02552	1.01776	1.01296	1.01902	1.02876	1.05284	1.00472	1.02466	1.01266	0.99708	0.98212	1.00476	1.02459	0.990798
	80	1.06168	1.08585	1.07377	1.05926	1.05864	1.05359	1.07436	1.0315	1.04658	1.02712	0.989781	0.978289	1.00794	1.02951	0.993865
	90	1.09346	1.13457	1.12158	1.08889	1.08875	1.0732	1.11742	1.06772	1.06986	1.02351	0.982482	0.970626	0.996825	1.00984	0.996933
	100	1.14579	1.17865	1.15027	1.14259	1.12203	1.1098	1.1546	1.11024	1.11781	1.04521	0.986861	0.979566	0.998413	1.01639	0.981595
	110	1.15888	1.1949	1.20902	1.16481	1.19651	1.14248	1.21722	1.20945	1.15479	1.01447	0.99562	0.977011	1.01587	0.996721	0.966258
	120	1.24299	1.25058	1.2377	1.2537	1.2504	1.24967	1.25049	1.26299	1.20959	1.00723	1.00146	0.970626	1.03333	1.01311	0.978528
	130	1.25047	1.18794	1.18989	1.22593	1.25515	1.18824	1.22896	1.26142	1.14795	0.980108	1.00292	0.98212	1.00317	1.02459	1.00767
	140	1.17383	1.16705	1.1612	1.16667	1.20919	1.15686	1.18982	1.23622	1.10411	1.01266	0.992701	0.992337	1.03175	1.03279	1.00153
	150	1.15701	1.12993	1.13661	1.14074	1.13629	1.11503	1.15068	1.16378	1.08082	0.983725	0.985401	0.98212	0.984127	1.0377	0.970859
	160	1.03364	1.05104	1.07377	1.01667	1.09826	1.05359	1.09198	1.07402	1.04795	0.981917	0.978102	0.993614	1.03492	1.03443	0.989264
	170	1.01495	1.0116	1.03142	1	1.02377	1.02614	1.05871	1.02362	1.02055	0.9783	0.992701	0.994891	1.00952	1.01967	0.993865
	180	1.00374	0.99768	0.984973	0.990741	0.998415	0.993464	1.01761	1.00787	1.00959	0.972875	0.986861	0.996169	1.00794	1.02787	0.996933
	190	1.01308	1.0116	1.03142	1.01296	1.00792	1.02353	1.05284	1.0315	1.05068	0.962025	0.978102	0.983397	1.01587	1.02623	0.981595
	200	1.0486	1.04176	1.09016	1.05185	1.02853	1.05752	1.09393	1.05669	1.10959	0.987342	0.982482	0.977011	1.01905	1.02623	1.0046
	210	1.11028	1.08121	1.13388	1.1037	1.05388	1.09542	1.14677	1.08346	1.1726	0.987342	0.976642	0.983397	1.01587	1.02787	1.00153
	220	1.1514	1.15081	1.20902	1.1537	1.11886	1.13595	1.20352	1.13701	1.20274	0.990958	1.01022	0.977011	1.01905	1.0377	0.970859
	230	1.20187	1.19026	1.2459	1.2	1.19334	1.23529	1.23288	1.20945	1.21233	0.990958	1.0146	0.980843	1.0127	1.03443	0.986196
	240	1.2486	1.2297	1.2582	1.25	1.24406	1.2549	1.26223	1.26929	1.22877	1.00723	1.01314	0.983397	0.993651	1.02951	0.989264
	250	1.23364	1.2529	1.25683	1.24074	1.23613	1.24575	1.23288	1.24409	1.21918	1.03255	0.99562	0.997446	1.00317	1.02787	1.00153
	260	1.21495	1.23202	1.24317	1.24074	1.24881	1.24052	1.23679	1.22835	1.2137	1.0434	0.985401	0.994891	1.0127	1.03279	0.996933
	270	1.25234	1.22506	1.25956	1.2463	1.24564	1.26275	1.25636	1.23622	1.2137	1.04521	0.989781	0.977011	1.01905	1.02459	0.989264
	280	1.2243	1.21114	1.2582	1.2463	1.24406	1.2366	1.24266	1.22835	1.20548	1.01085	0.986861	0.980843	1.01587	1.02787	0.983129
	290	1.23178	1.22042	1.27459	1.24259	1.24406	1.25229	1.22896	1.24094	1.21233	1.02712	0.986861	0.969349	1.01587	1.01639	0.981595
	300	1.21495	1.2181	1.25683	1.24074	1.22029	1.23529	1.23875	1.23622	1.19863	1.05606	0.99562	0.969349	1.02222	1.02951	0.989264
	310	1.2486	1.2529	1.26366	1.23704	1.23613	1.23922	1.24853	1.2315	1.22603	0.990958	0.989781	0.969349	1	1.02787	0.981595
	320	1.24299	1.22506	1.25956	1.23148	1.21236	1.22876	1.25049	1.22835	1.22329	1.03436	0.976642	0.968072	1.0127	1.04754	0.998466
	330	1.24299	1.22506	1.24454	1.23148	1.20444	1.2366	1.23288	1.2126	1.22055	1.03074	0.970803	0.978289	0.993651	1.03279	1.00307
	340	1.23738	1.23434	1.24727	1.24259	1.20761	1.24183	1.2407	1.22992	1.21918	0.992767	0.973723	0.98212	1.03333	1.02623	0.996933
	350	1.23738	1.2297	1.24044	1.24259	1.21712	1.25752	1.25049	1.23622	1.2137	0.998192	0.976642	0.99106	1.03175	1.02623	1.01227
	360	1.23178	1.23202	1.23497	1.22593	1.21395	1.24444	1.22896	1.19685	1.21096	1.02712	0.989781	0.987229	1.03175	1.02459	1.01994
	370	1.23178	1.23434	1.24317	1.22037	1.20444	1.22614	1.24853	1.20945	1.20822	0.985533	0.991241	0.987229	1.02063	1.02131	1.02454
	380	1.21682	1.22738	1.24454	1.21852	1.2187	1.2366	1.2544	1.22047	1.20822	1.03978	0.986861	0.983397	1.02381	1.0377	1.02761
	390	1.21682	1.22274	1.22951	1.2037	1.21553	1.22876	1.27006	1.22047	1.20411	0.990958	0.988321	0.997446	1.00317	1.03443	1.03528
	400	1.21495	1.23202	1.23224	1.21296	1.19017	1.23399	1.24266	1.2126	1.20274	0.998192	0.991241	1	1.00159	1.03443	1.02761
	410	1.21495	1.2413	1.23634	1.20741	1.21236	1.24183	1.25636	1.2126	1.22192	1.01266	0.986861	1.00255	1	1.01639	1.01994
	420	1.21869	1.24362	1.23087	1.20556	1.22821	1.24837	1.23288	1.22047	1.21918	1.03074	0.989781	0.996169	0.984127	1.02459	1.02147

## Sheet: Figure 6F
Figure 6F		FGFR1-His+JH III			FGFR1-M1-His+JH III			FGFR1-M2-His+JH III			FGFR1-M3-His+JH III			FGFR1-M4-His+JH III
	0	1	1	1	1	1	1	1	1	1	1	1	1	1	1	1
	10	1.00438	1.01093	0.996094	1	1.01418	1.00893	1.00325	1.00822	1	1.00317	1.01958	0.998285	0.992366	0.998594	1.00182
	20	0.978102	0.994536	1.02539	1.0126	1.02128	1.01964	1.01948	1.01096	1.00952	1.02063	1.00783	1.00686	0.99542	0.991561	1
	30	0.963504	1	1.04492	1.01732	1.00709	1	1.00325	1	0.986667	0.992063	0.998695	0.981132	0.977099	1.01406	1.01091
	40	1.00292	0.997268	1.01758	1	1.01135	1.02143	1.01461	1.00274	1.00571	1.00794	1.00522	0.977702	0.974046	1.00563	1.01455
	50	1.00438	1.01776	1.00586	0.988976	1.00851	1.01964	1.00649	1.00822	0.988571	1.01429	1.01175	0.960549	0.969466	1.01406	0.990909
	60	0.992701	1.0041	1.00586	0.995276	1.01986	1.00893	1.00974	1.00274	1.01143	1.00159	1.00261	0.974271	0.977099	1.01406	0.996364
	70	1.03942	1.02732	1.03125	1.01102	1.03972	1.03393	1.02597	1.01918	1.0381	1.02381	1.00522	0.975986	0.989313	1.01547	0.992727
	80	1.07299	1.07377	1.03906	1.04724	1.08511	1.06964	1.05844	1.02877	1.07238	1.02857	1.01958	1.04288	0.984733	1.01969	0.998182
	90	1.08613	1.10109	1.08984	1.07244	1.11489	1.11786	1.07143	1.04795	1.10286	1.04603	1.03525	1.03774	1.00458	1.0211	1.00727
	100	1.10365	1.14071	1.16797	1.13071	1.15035	1.13929	1.10877	1.09178	1.17714	1.09365	1.03655	1.05832	1.00763	1.01266	0.981818
	110	1.16934	1.16803	1.18164	1.14646	1.16738	1.19464	1.17208	1.17123	1.20952	1.10794	1.08355	1.05489	1.01527	1.00985	0.978182
	120	1.21606	1.22404	1.22266	1.2063	1.20993	1.22321	1.20292	1.20822	1.22857	1.11905	1.13055	1.06347	0.992366	0.992968	0.978182
	130	1.18248	1.20492	1.19336	1.15276	1.16028	1.2	1.16234	1.20411	1.18095	1.12381	1.12271	1.10635	1.01221	1.01406	1.01273
	140	1.15036	1.18169	1.09766	1.14173	1.14326	1.15714	1.13312	1.13973	1.15429	1.09365	1.08355	1.07547	0.99542	1.01266	1
	150	1.12117	1.13388	1.07422	1.13543	1.12057	1.1125	1.08279	1.07123	1.10476	1.07619	1.03786	1.06003	0.989313	1.01688	0.963636
	160	1.08321	1.07923	1.05664	1.0315	1.08794	1.08571	1.06981	1.0411	1.06857	1.02381	1.01958	1.04288	1.0229	1.01406	0.990909
	170	1.0365	1.04918	1.05078	1.00945	1.05106	1.06964	1.04058	1.02877	1.0381	1.0127	1.01175	1.01029	1.03053	1.01688	0.996364
	180	0.99562	1.00546	1.04688	1	1.00709	1.01786	1.00649	1.01096	1.00952	0.993651	0.992167	0.994854	1.02595	1.01969	1
	190	1.01898	1.03005	1.06055	1.01417	1.03546	1.05536	1.04383	1.01781	1.05905	1.01587	1.00783	1.00343	1.02748	1.01266	0.981818
	200	1.03942	1.07787	1.08594	1.04724	1.05674	1.09286	1.08929	1.0411	1.08762	1.04444	1.01958	1.00686	1.03206	1.01969	1.01455
	210	1.15328	1.11339	1.13477	1.09606	1.0922	1.12679	1.125	1.05753	1.1219	1.07619	1.03786	1.01544	1.00763	1.01547	1.00182
	220	1.18686	1.1776	1.17773	1.13071	1.12482	1.1625	1.16558	1.08219	1.16381	1.08095	1.05744	1.03259	1.01527	1.02813	0.98
	230	1.19708	1.21585	1.20117	1.17323	1.21277	1.19821	1.18831	1.13425	1.2019	1.12381	1.07572	1.04631	1.01985	1.02672	0.969091
	240	1.23212	1.23634	1.23047	1.20945	1.2227	1.21964	1.21104	1.21781	1.22857	1.1254	1.08877	1.05489	0.992366	1.01547	0.990909
	250	1.22628	1.21585	1.25195	1.20472	1.21986	1.21429	1.2013	1.20548	1.24762	1.13016	1.09661	1.05489	1.00305	1.01266	1.00545
	260	1.2146	1.20902	1.25195	1.2315	1.22128	1.2125	1.20942	1.21918	1.2381	1.1381	1.10313	1.05146	1.00763	1.02532	1.00909
	270	1.21168	1.22404	1.25391	1.21575	1.23121	1.23214	1.19481	1.21233	1.21524	1.13968	1.10966	1.06003	0.992366	1.01266	0.981818
	280	1.21898	1.22268	1.25586	1.20945	1.20851	1.225	1.18182	1.21233	1.2	1.12698	1.10444	1.04631	0.989313	1.02813	0.981818
	290	1.23212	1.20219	1.25391	1.20157	1.20993	1.20893	1.19481	1.20822	1.2019	1.12698	1.10835	1.04631	0.98626	1.02672	0.990909
	300	1.22628	1.22951	1.25977	1.20945	1.21277	1.19643	1.20942	1.20822	1.20381	1.13333	1.11227	1.05489	1.00458	1.02813	0.990909
	310	1.21898	1.21585	1.20117	1.20945	1.23404	1.1875	1.20455	1.20274	1.20952	1.13016	1.12533	1.0566	1.00153	1.00844	0.985455
	320	1.22044	1.22268	1.19727	1.20472	1.21986	1.2	1.21266	1.19178	1.21524	1.12381	1.12271	1.04631	1.01221	1.01125	1.00182
	330	1.22336	1.22678	1.21094	1.22205	1.22695	1.21786	1.19805	1.2	1.19048	1.13016	1.1201	1.05489	1.00763	1.01266	1.00727
	340	1.2146	1.20219	1.23047	1.2126	1.22553	1.2	1.19481	1.20274	1.21714	1.12381	1.11358	1.04631	0.981679	1.01406	1.01818
	350	1.23358	1.20628	1.2207	1.20945	1.20851	1.19643	1.20617	1.2	1.21905	1.12857	1.10705	1.04631	0.984733	1.02391	1.02182
	360	1.23504	1.20902	1.23242	1.2063	1.20567	1.20536	1.20942	1.19178	1.21143	1.13651	1.11097	1.05489	1.01985	1.02532	1.02727
	370	1.22628	1.21038	1.23047	1.20157	1.20993	1.20179	1.19481	1.20548	1.21524	1.13492	1.12271	1.06003	1.0229	1.03376	1.03273
	380	1.21168	1.21995	1.24023	1.19055	1.21844	1.19643	1.19968	1.20959	1.20952	1.12857	1.12141	1.05146	1.02748	1.02672	1.04
	390	1.21168	1.21585	1.24023	1.18898	1.2156	1.19821	1.20455	1.20685	1.22286	1.12698	1.11619	1.04631	1.01527	1.02391	1.03636
	400	1.20438	1.22268	1.22656	1.2063	1.20709	1.19643	1.18506	1.20548	1.2019	1.1254	1.11749	1.04631	1.00763	1.02391	1.04545
	410	1.21898	1.21585	1.21094	1.20157	1.21277	1.2	1.19318	1.21096	1.2019	1.12857	1.1201	1.06003	1.01985	1.02672	1.03455
	420	1.21606	1.22268	1.23047	1.1937	1.22837	1.19643	1.20455	1.20548	1.21333	1.13175	1.1201	1.04631	1.01374	1.02391	1.03273
